# Supplementary material
Source: PubMed Central journal article supplement (PMC6488304)
Supplement: NIHMS1016811-supplement-SI.pdf [file NIHMS1016811-supplement-SI.pdf]

# Synthesis and Evaluation of QS-21-Based Immunoadjuvants with a Terminal-Functionalized Side Chain Incorporated in the West Wing Trisaccharide

Pengfei Wang,<sup>\*†</sup> Dattatray A. Devalankar,<sup>†</sup> Qipu Dai,<sup>†</sup> Ping Zhang,<sup>\*‡</sup> and Suzanne M. Michalek<sup>§</sup>  
<sup>†</sup>Department of Chemistry, <sup>‡</sup>Department of Pediatric Dentistry, <sup>§</sup>Department of Microbiology, University of Alabama at Birmingham, 901 14<sup>th</sup> Street South, Birmingham, AL 35294

## Table of Content

|                                                              | Page   |
|--------------------------------------------------------------|--------|
| Table of content                                             | S1     |
| <sup>1</sup> H and <sup>13</sup> C NMR spectra of <b>8</b>   | S2-3   |
| <sup>1</sup> H and <sup>13</sup> C NMR spectra of <b>9</b>   | S4-5   |
| <sup>1</sup> H and <sup>13</sup> C NMR spectra of <b>20x</b> | S6-7   |
| <sup>1</sup> H and <sup>13</sup> C NMR spectra of <b>21x</b> | S8-9   |
| <sup>1</sup> H and <sup>13</sup> C NMR spectra of <b>22x</b> | S10-11 |
| <sup>1</sup> H and <sup>13</sup> C NMR spectra of <b>3x</b>  | S12-13 |
| <sup>1</sup> H and <sup>13</sup> C NMR spectra of <b>4x</b>  | S14-15 |
| <sup>1</sup> H and <sup>13</sup> C NMR spectra of <b>5x</b>  | S16-17 |

1H

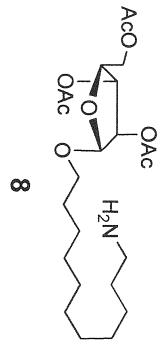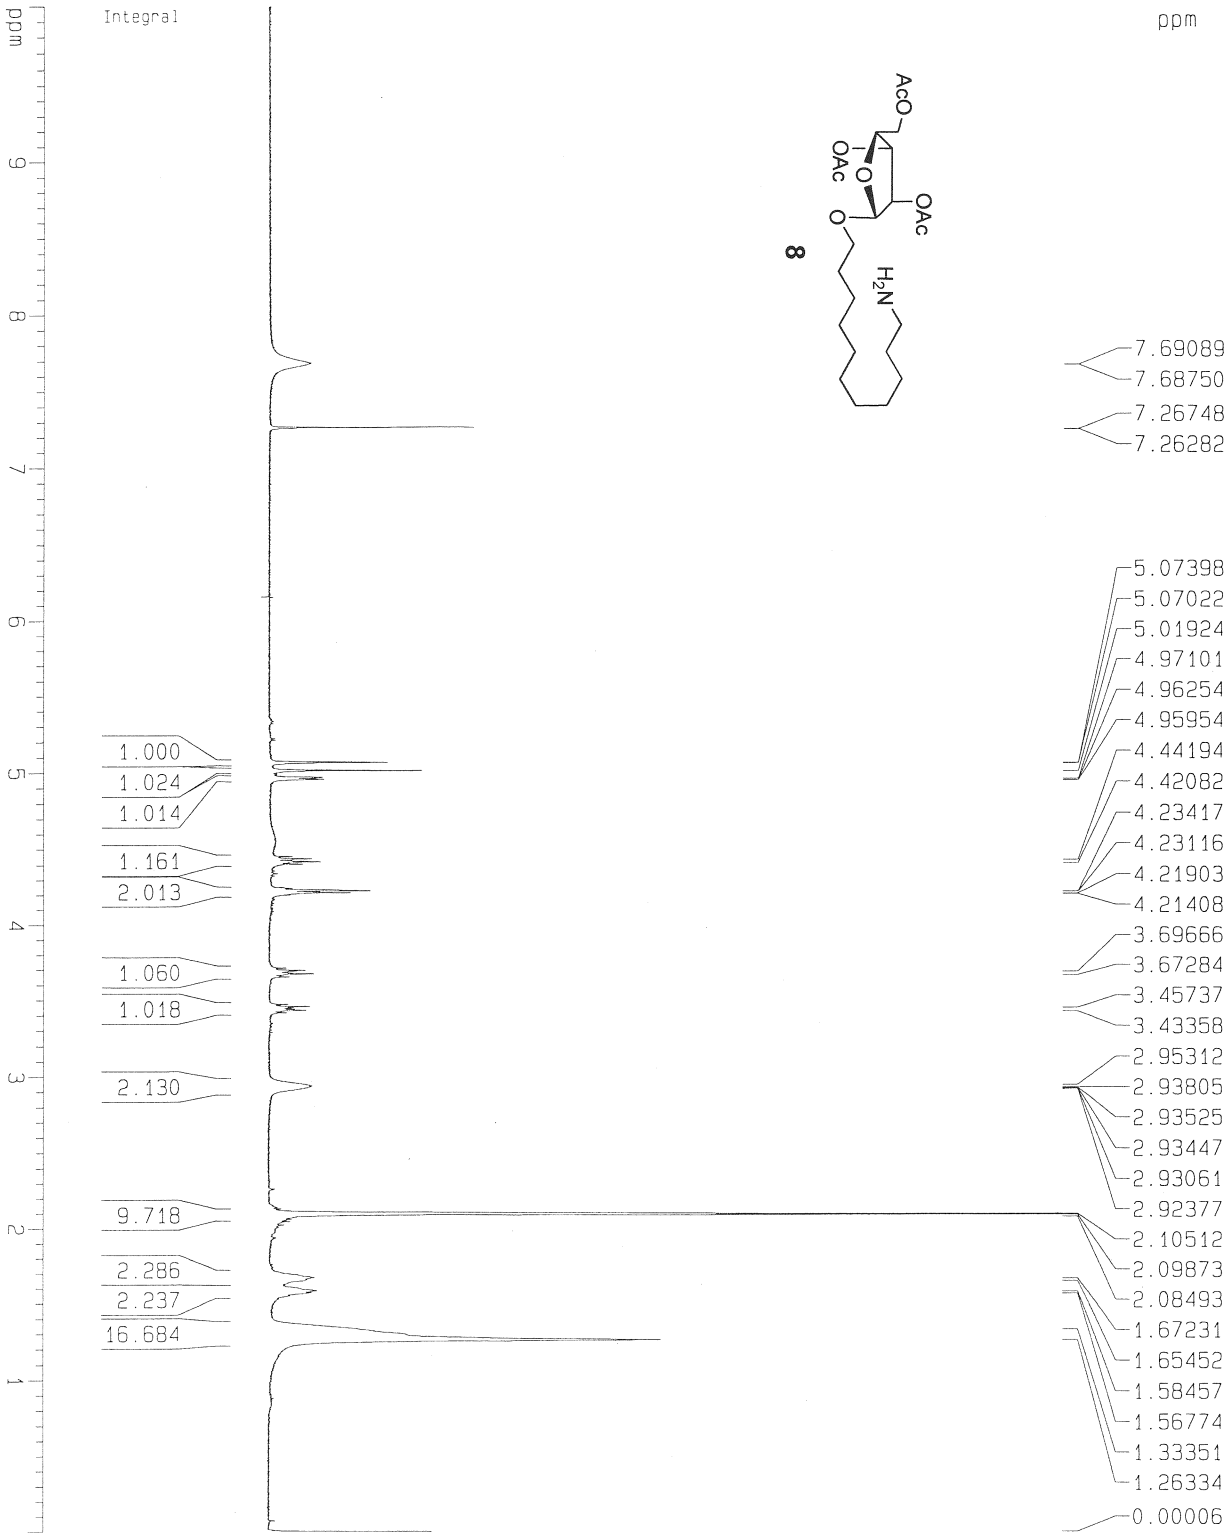

Current Data Parameters  
 NAME dd-3-131pure1  
 EXPNO 1  
 PROCNO 1

F2 - Acquisition Parameters

Date\_ 20151221  
 Time 15.54  
 INSTRUM drx400  
 PROBH0 5 mm Multinu  
 PULPROG zg30  
 TD 65536  
 SOLVENT CDCl3  
 NS 16  
 DS 2  
 SMH 8278.146 Hz  
 FIDRES 0.126314 Hz  
 A0 3.9584243 sec  
 RG 645.1  
 DW 60.400 usec.  
 DE 6.00 usec  
 TE 300.0 K  
 D1 1.00000000 sec

===== CHANNEL f1 =====

NUC1 1H  
 P1 6.50 usec  
 PL1 0.00 dB  
 SF01 400.1324710 MHz

F2 - Processing parameters

S1 131072  
 SF 400.1300061 MHz  
 WDM no  
 SSB 0  
 LB 0.00 Hz  
 GB 0  
 PC 1.00

1D NMR plot parameters

CX 20.00 cm  
 F1P 10.000 ppm  
 F1 4001.30 Hz  
 F2P 0.000 ppm  
 F2 0.00 Hz  
 PRKCM 0.50000 ppm/cm  
 HZCM 200.06500 Hz/cm

13C w/ 1H decoupling

ppm

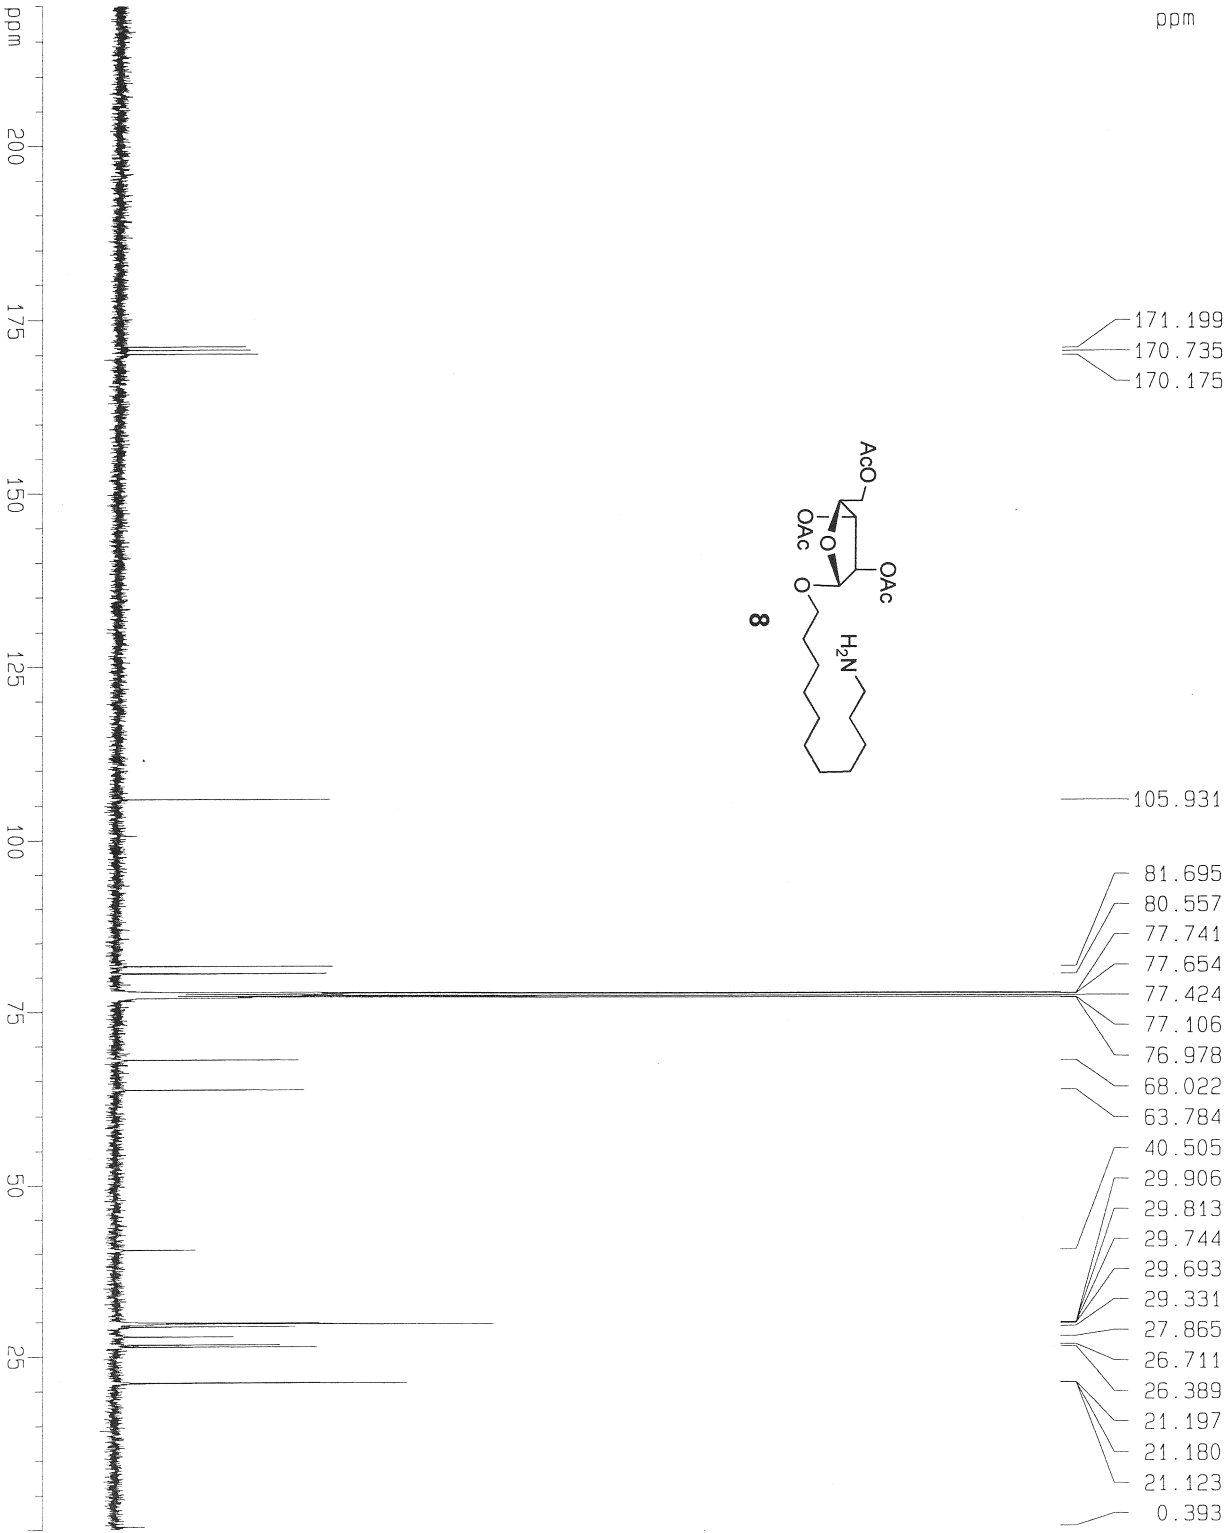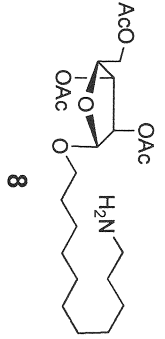

Current Data Parameters  
 NAME dd-3-13113c  
 EXPNO 1  
 PROCNO 1

F2 - Acquisition Parameters  
 Date\_ 20151222  
 Time 16.07  
 INSTRUM drx400  
 PROBD 5 mm Multinu  
 PULPROG zgpg30  
 TD 65536  
 SOLVENT CDCl3  
 NS 8192  
 DS 0  
 SWH 25125.629 Hz  
 FIDRES 0.383387 Hz  
 AQ 1.3042164 sec  
 RG 32768  
 DW 19.900 usec  
 DE 6.00 usec  
 TE 300.0 K  
 D1 2.000000000 sec  
 D11 0.030000000 sec  
 D12 0.000020000 sec

==== CHANNEL f1 =====  
 NUC1 13C  
 P1 16.00 usec  
 PL1 0.00 dB  
 SF01 100.6237959 MHz

==== CHANNEL f2 =====  
 CPDPRG2 waltz16  
 NUC2 1H  
 PGPD2 102.00 usec  
 PL2 0.00 dB  
 PL12 23.00 dB  
 PL13 23.00 dB  
 SF02 400.1316005 MHz

F2 - Processing parameters  
 SI 131072  
 SF 100.6127290 MHz  
 KDW EM  
 SSB 0  
 LB 1.00 Hz  
 GB 0  
 PC 1.40

1D NMR plot parameters  
 CX 20.00 cm  
 F1P 220.000 ppm  
 F1 22134.80 Hz  
 F2P 0.000 ppm  
 F2 0.00 Hz  
 PPRCM 11.00000 ppm/cm  
 HZCM 1106.73999 Hz/cm

1H

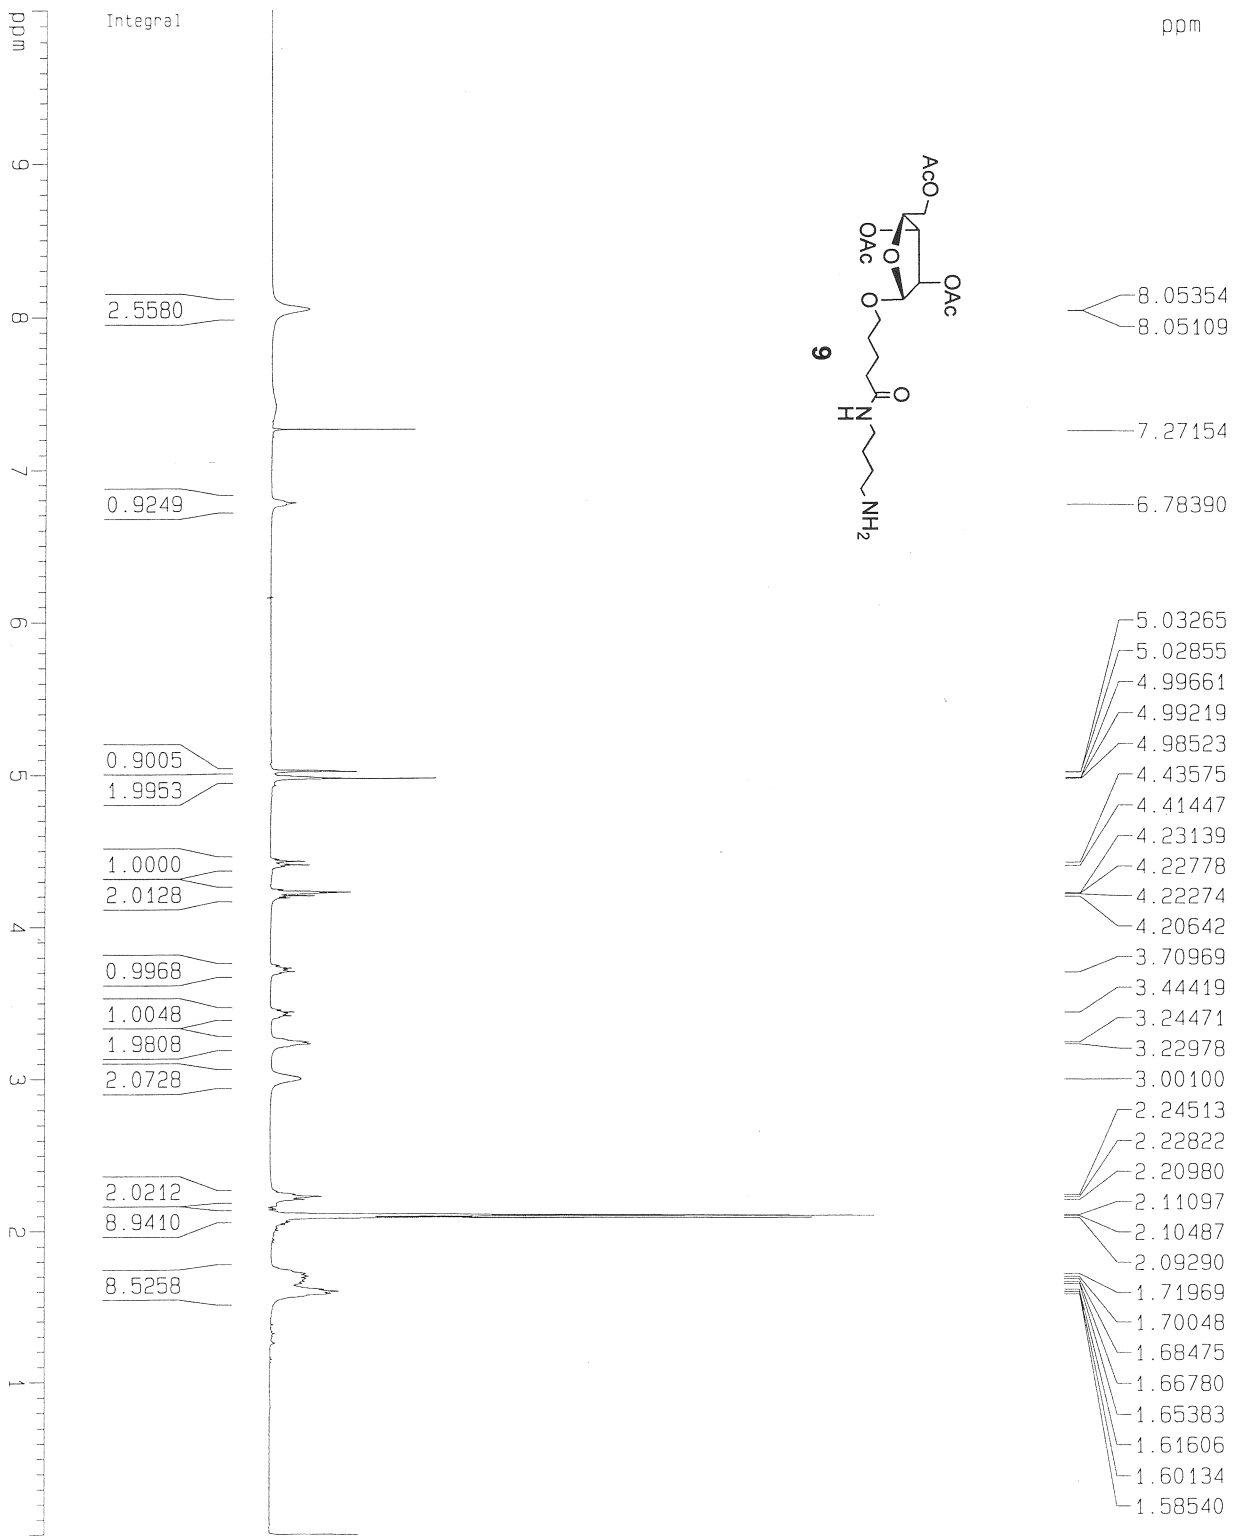

Current Data Parameters  
 NAME dd-3-133a  
 EXPNO 1  
 PROCNO 1

F2 - Acquisition Parameters  
 Date\_ 20151223  
 Time 8:32  
 INSTRUM gnx400  
 PROBHD 5 mm MUltinu  
 PULPROG zg30  
 TD 65536  
 SOLVENT CDCl3  
 NS 16  
 DS 2  
 SWH 8278.146 Hz  
 FIDRES 0.126314 Hz  
 AQ 3.9584243 sec  
 RG 101.6  
 DW 60.400 usec  
 DE 6.00 usec  
 TE 300.0 K  
 D1 1.00000000 sec

===== CHANNEL f1 =====  
 NUC1 1H  
 P1 6.50 usec  
 PL1 0.00 dB  
 SF01 400.1324710 MHz

F2 - Processing parameters  
 SI 131072  
 SF 400.1300044 MHz  
 WDW no  
 SSB 0  
 LB 0.00 Hz  
 GB 0  
 PC 1.00

1D NMR plot parameters  
 CX 20.00 cm  
 F1P 10.000 ppm  
 F1 4001.30 Hz  
 F2P 0.000 ppm  
 F2 0.00 Hz  
 PPMCM 0.50000 ppm/cm  
 HZCM 200.06500 Hz/cm

13C w/ 1H decoupling

- 174.981
- 171.237
- 170.704
- 170.579
- 105.988
- 81.956
- 80.445
- 77.762
- 77.643
- 77.444
- 77.126
- 67.509
- 63.573
- 39.866
- 38.925
- 36.159
- 31.318
- 28.930
- 26.555
- 24.808
- 22.873
- 21.164
- 21.028

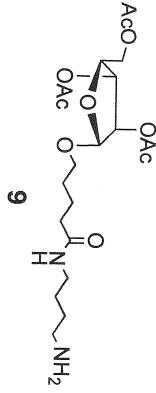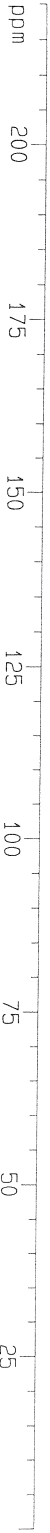

Current Data Parameters  
 dd-3-133c13  
 EXPNO 1  
 PROCNO 1

F2 - Acquisition Parameters  
 Date\_ 20151223  
 Time 10.02

INSTRUM drx400  
 PROBHD 5 mm Multinu  
 PULPROG zgpg30  
 TD 65536  
 SOLVENT DMS-D6  
 NS 1024

DS 4  
 SWH 25125.629 Hz  
 FIDRES 0.383387 Hz  
 AQ 1.3042164 sec  
 RG 32768

DW 19.900 usec  
 DE 6.00 usec  
 TE 300.0 K  
 D1 2.00000000 sec  
 D11 0.03000000 sec  
 D12 0.00002000 sec

===== CHANNEL f1 =====  
 NUC1 13C

P1 16.00 usec  
 PL1 0.00 dB  
 SF01 100.6237959 MHz

===== CHANNEL f2 =====  
 CPGPRG2 waltz16

NUC2 1H  
 PCPD2 102.00 usec  
 PL2 0.00 dB  
 PL12 23.00 dB  
 PL13 23.00 dB  
 SF02 400.1316005 MHz

F2 - Processing parameters

SI 131072  
 SF 100.6127299 MHz  
 WDW EM  
 SSB 0  
 LB 1.00 Hz  
 GB 0  
 PC 1.40

1D NMR plot parameters

CX 20.00 cm  
 F1P 220.000 ppm  
 F1 22134.80 Hz  
 F2P 0.000 ppm  
 F2 0.00 Hz  
 PPMCM 11.00000 ppm/cm  
 HZCM 1106.73999 Hz/cm

PW-VIII-13-C1A

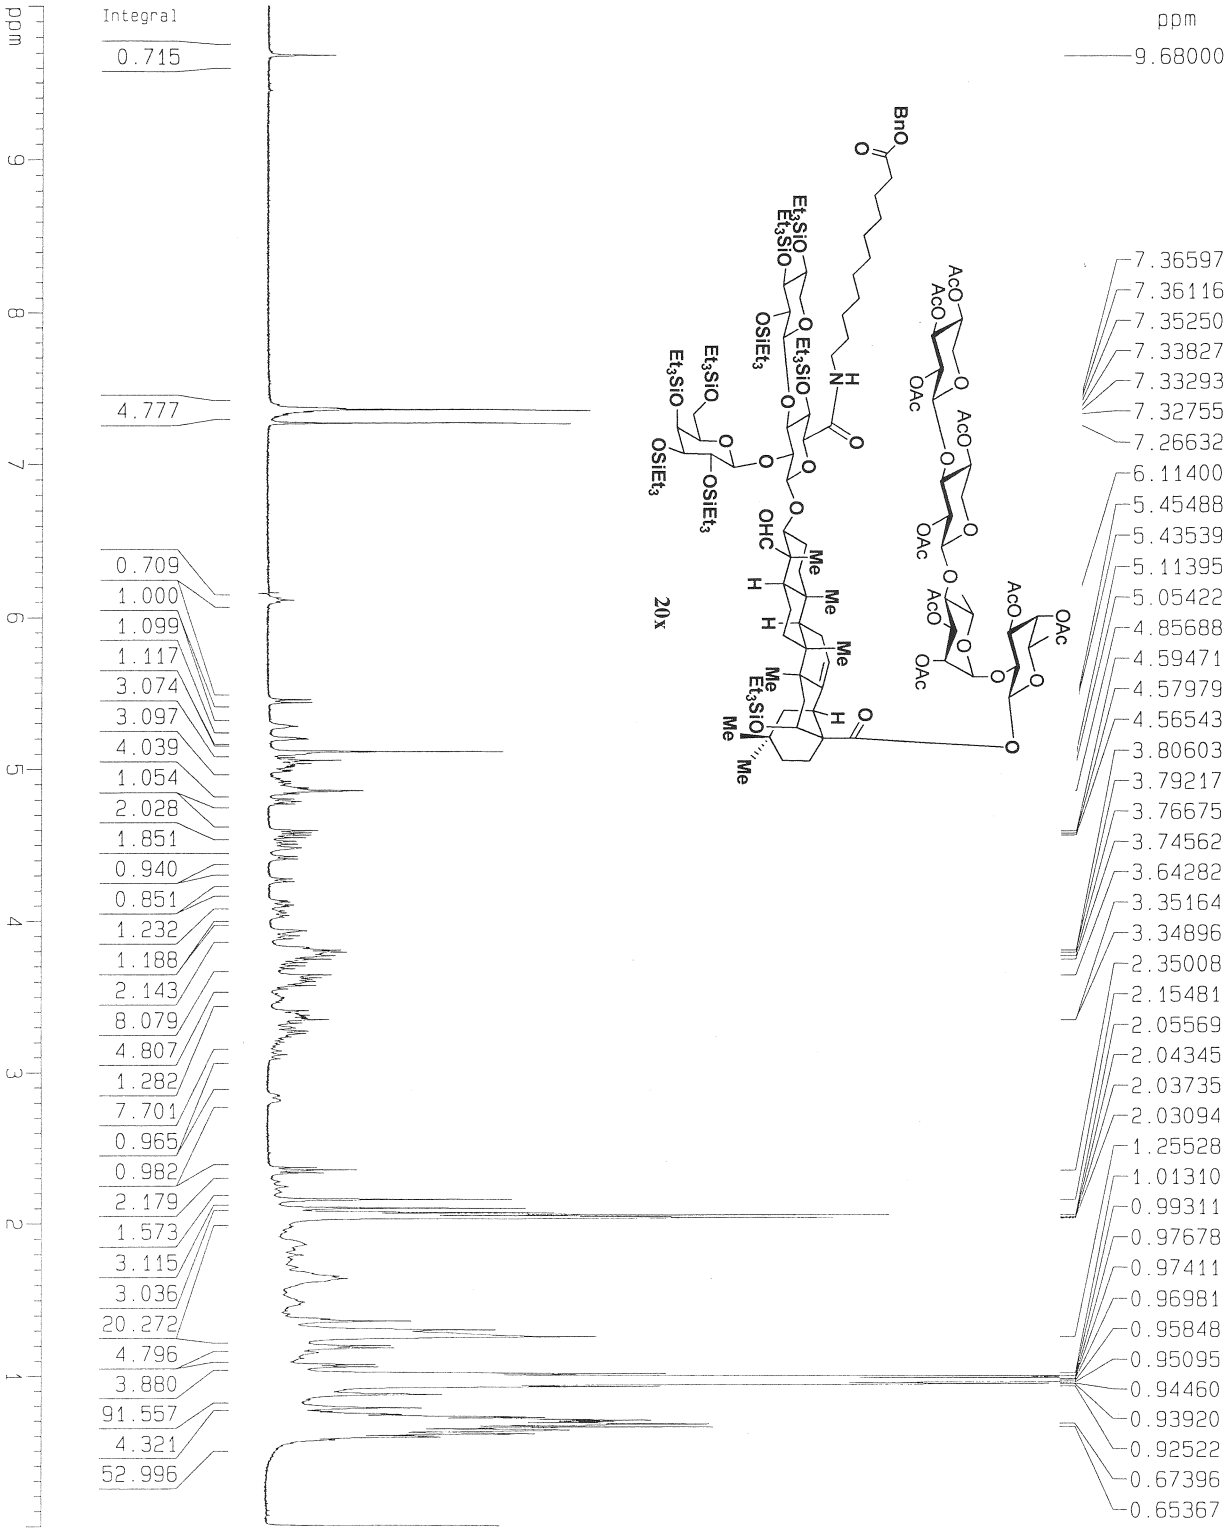

Current Data Parameters  
 NAME PW-VIII-13c1a  
 EXPNO 1  
 PROCNO 1

F2 - Acquisition Parameters  
 Date\_ 20130617  
 Time 9.17

INSTRUM drx400  
 PROBHD 5 mm Multinu  
 PULPROG zg30

TD 65536  
 SOLVENT CDCl3  
 NS 15  
 DS 2

SMH 8278.146 Hz  
 FIDRES 0.126314 Hz  
 AQ 3.9584243 sec

RG 256  
 DW 60.400 usec  
 DE 6.00 usec  
 TE 300.0 K

D1 1.00000000 sec

===== CHANNEL f1 =====  
 NUC1 1H

P1 6.50 usec  
 PL1 0.00 dB  
 SF01 400.1324710 MHz

F2 - Processing parameters  
 SI 131072  
 SF 400.1300066 MHz

WDW no  
 SSB 0  
 LB 0.00 Hz  
 GB 0  
 PC 1.00

1D NMR plot parameters  
 CX 20.00 cm  
 F1P 10.000 ppm  
 F1 4001.30 Hz  
 F2P 0.000 ppm  
 F2 0.00 Hz

PPMCM 0.50000 ppm/cm  
 HZCM 200.05500 Hz/cm

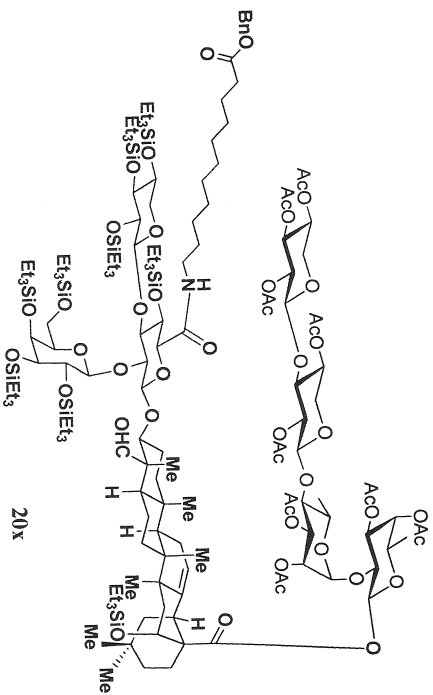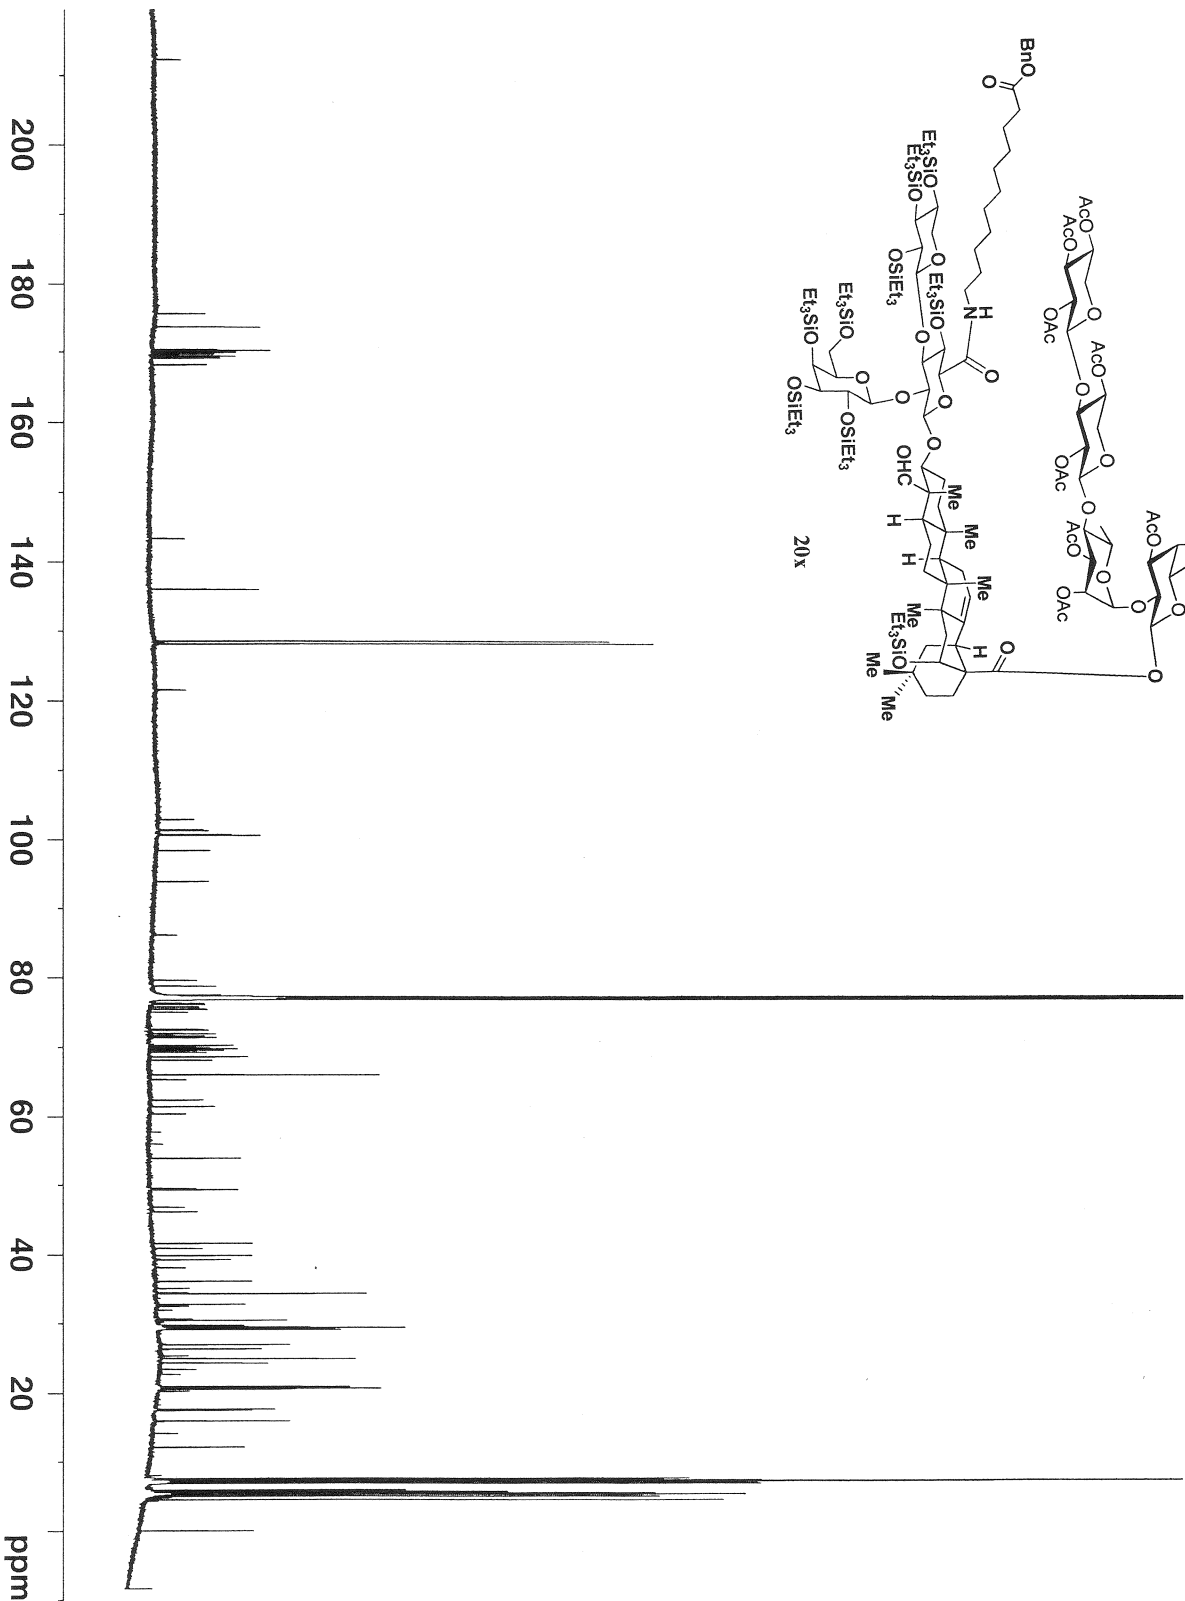

|         |               |
|---------|---------------|
| NAME    | VII-13        |
| EXPNO   | 702           |
| PROCNO  | 1             |
| Date_   | 20130619      |
| Time    | 15.55         |
| INSTRUM | spect         |
| PROBHD  | 5 mm CP131 H- |
| PULPROG | zgpg30        |
| TD      | 65536         |
| SOLVENT | CDCl3         |
| NS      | 4096          |
| DS      | 4             |
| SWH     | 41666.668 Hz  |
| FIDRES  | 0.635783 Hz   |
| AQ      | 0.7864820 se  |
| RG      | 64            |
| DW      | 12.000 us     |
| DE      | 20.00 us      |
| TE      | 296.6 K       |
| D1      | 4.19999981 se |
| D11     | 0.03000000 se |
| TD0     | 1             |

  

|                        |                 |
|------------------------|-----------------|
| ===== CHANNEL F1 ===== |                 |
| NUC1                   | 13C             |
| P1                     | 11.80 us        |
| PL1                    | -1.30 dB        |
| PL1W                   | 128.76077271 W  |
| SFO1                   | 176.0395312 MHz |

  

|                        |                 |
|------------------------|-----------------|
| ===== CHANNEL F2 ===== |                 |
| CPDPRG2                | waltz16         |
| NUC2                   | 1H              |
| PCPD2                  | 65.00 us        |
| PL2                    | 1.30 dB         |
| PL12                   | 19.50 dB        |
| PL13                   | 19.50 dB        |
| PL2W                   | 6.88972235 W    |
| PL12W                  | 0.10428017 W    |
| PL13W                  | 0.10428017 W    |
| SFO2                   | 700.0228001 MHz |
| SI                     | 131072          |
| SF                     | 176.0201725 MHz |
| WDW                    | EM              |
| SSB                    | 0               |
| LB                     | 1.00 Hz         |
| GB                     | 0               |
| PC                     | 1.40            |

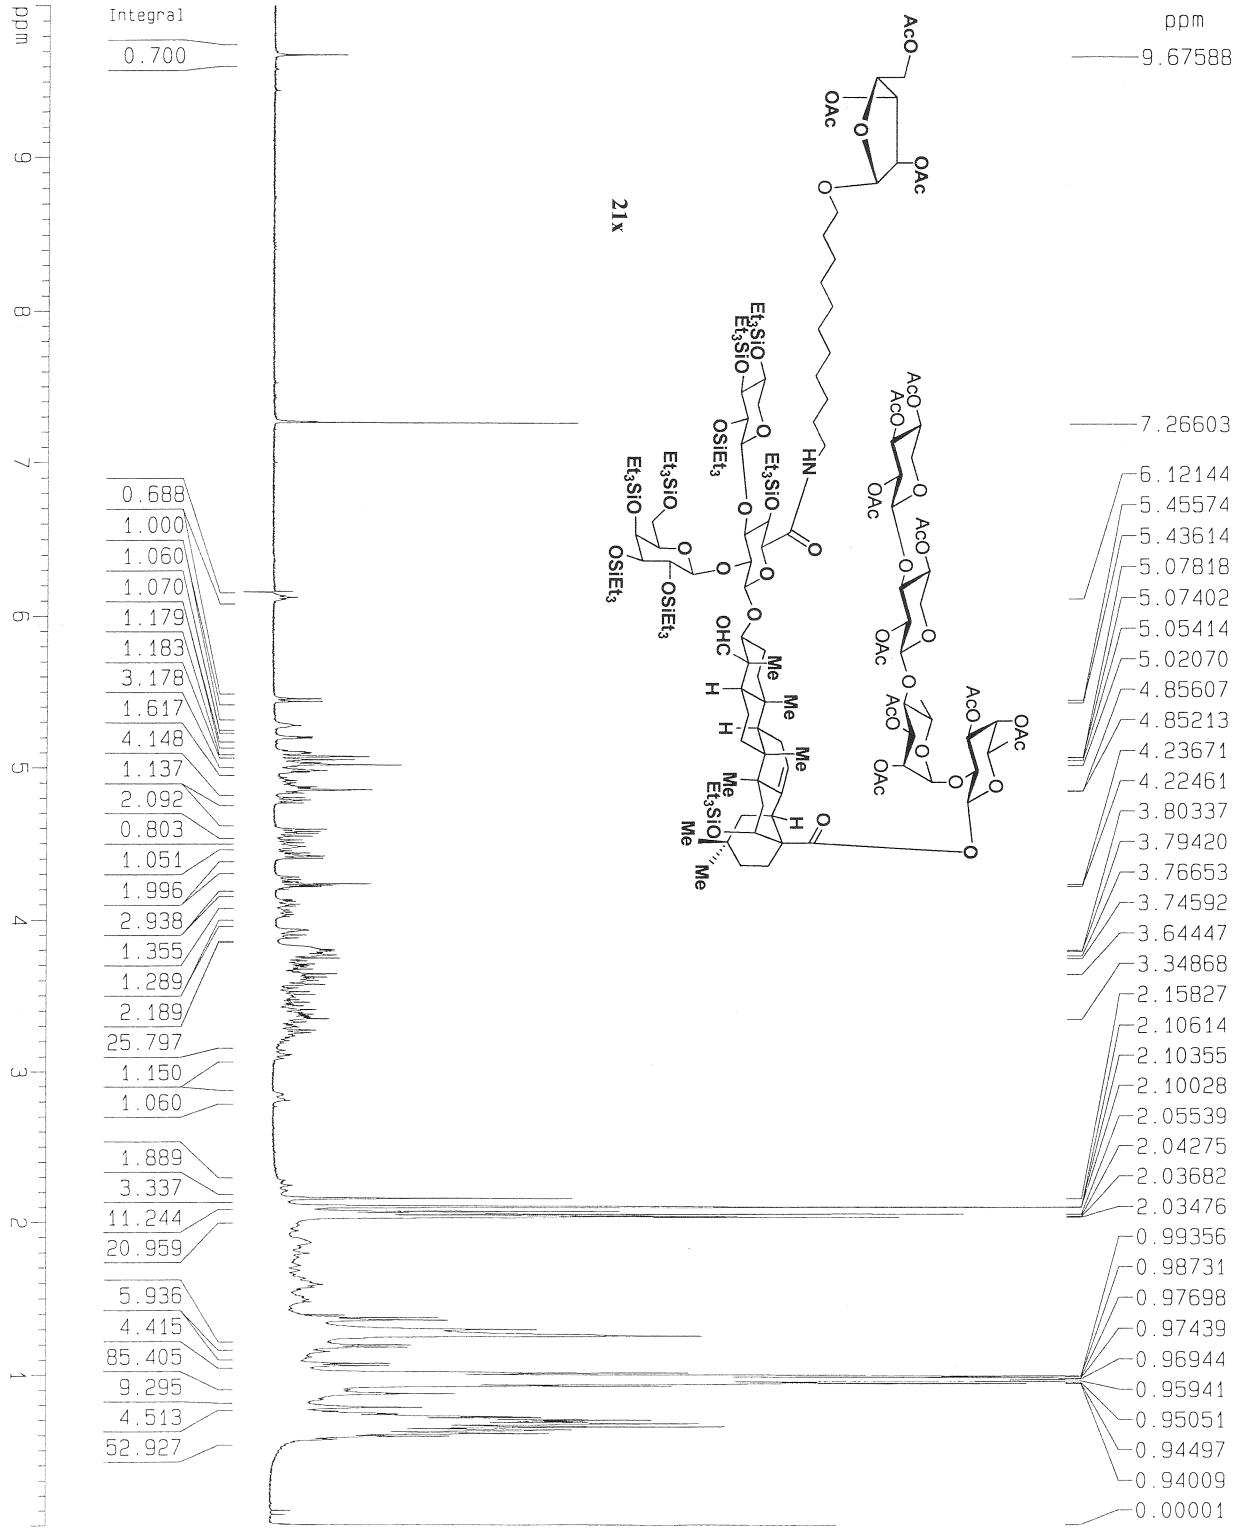

Current Data Parameters  
 NAME PW-VIII-12c2a  
 EXPNO 1  
 PROCNO 1

F2 - Acquisition Parameters  
 Date\_ 20130617  
 Time 8.52  
 INSTRUM drx400  
 PROBHD 5 mm Multinu  
 PULPROG zg30  
 TD 65536  
 SOLVENT CDCl3  
 NS 16  
 DS 2  
 SWH 8278.146 HZ  
 FIDRES 0.126314 HZ  
 AQ 3.9584243 sec.  
 RG 181  
 DW 60.400 usec  
 DE 6.00 usec  
 TE 300.0 K  
 D1 1.00000000 sec

==== CHANNEL f1 =====  
 NUC1 1H  
 P1 6.50 usec  
 PL1 0.00 dB  
 SF01 400.1324710 MHz

F2 - Processing parameters  
 SI 131072  
 SF 400.1300055 MHz  
 KW 0  
 SSB 0  
 LB 0.00 HZ  
 GB 0  
 PC 1.00

1D NMR plot parameters  
 CX 20.00 cm  
 F1p 10.000 ppm  
 F1 4001.30 HZ  
 F2p 0.000 ppm  
 F2 0.00 HZ  
 PPMCM 0.50000 ppm/cm  
 HZCM 200.06500 HZ/cm



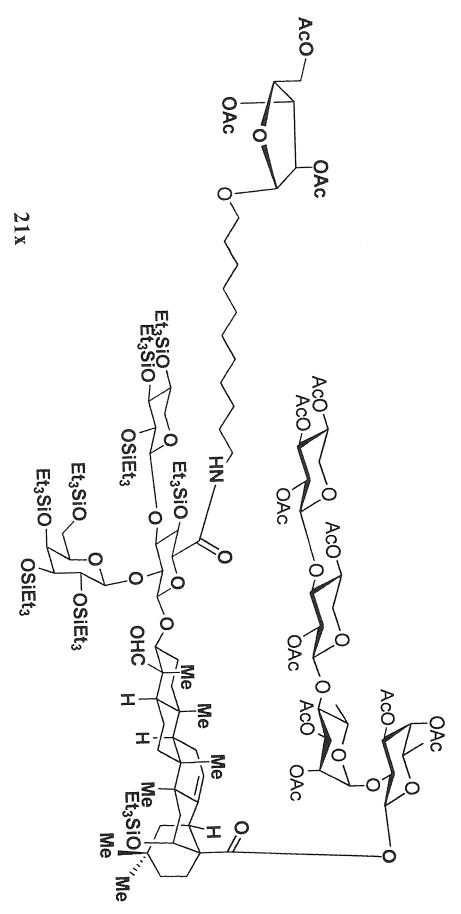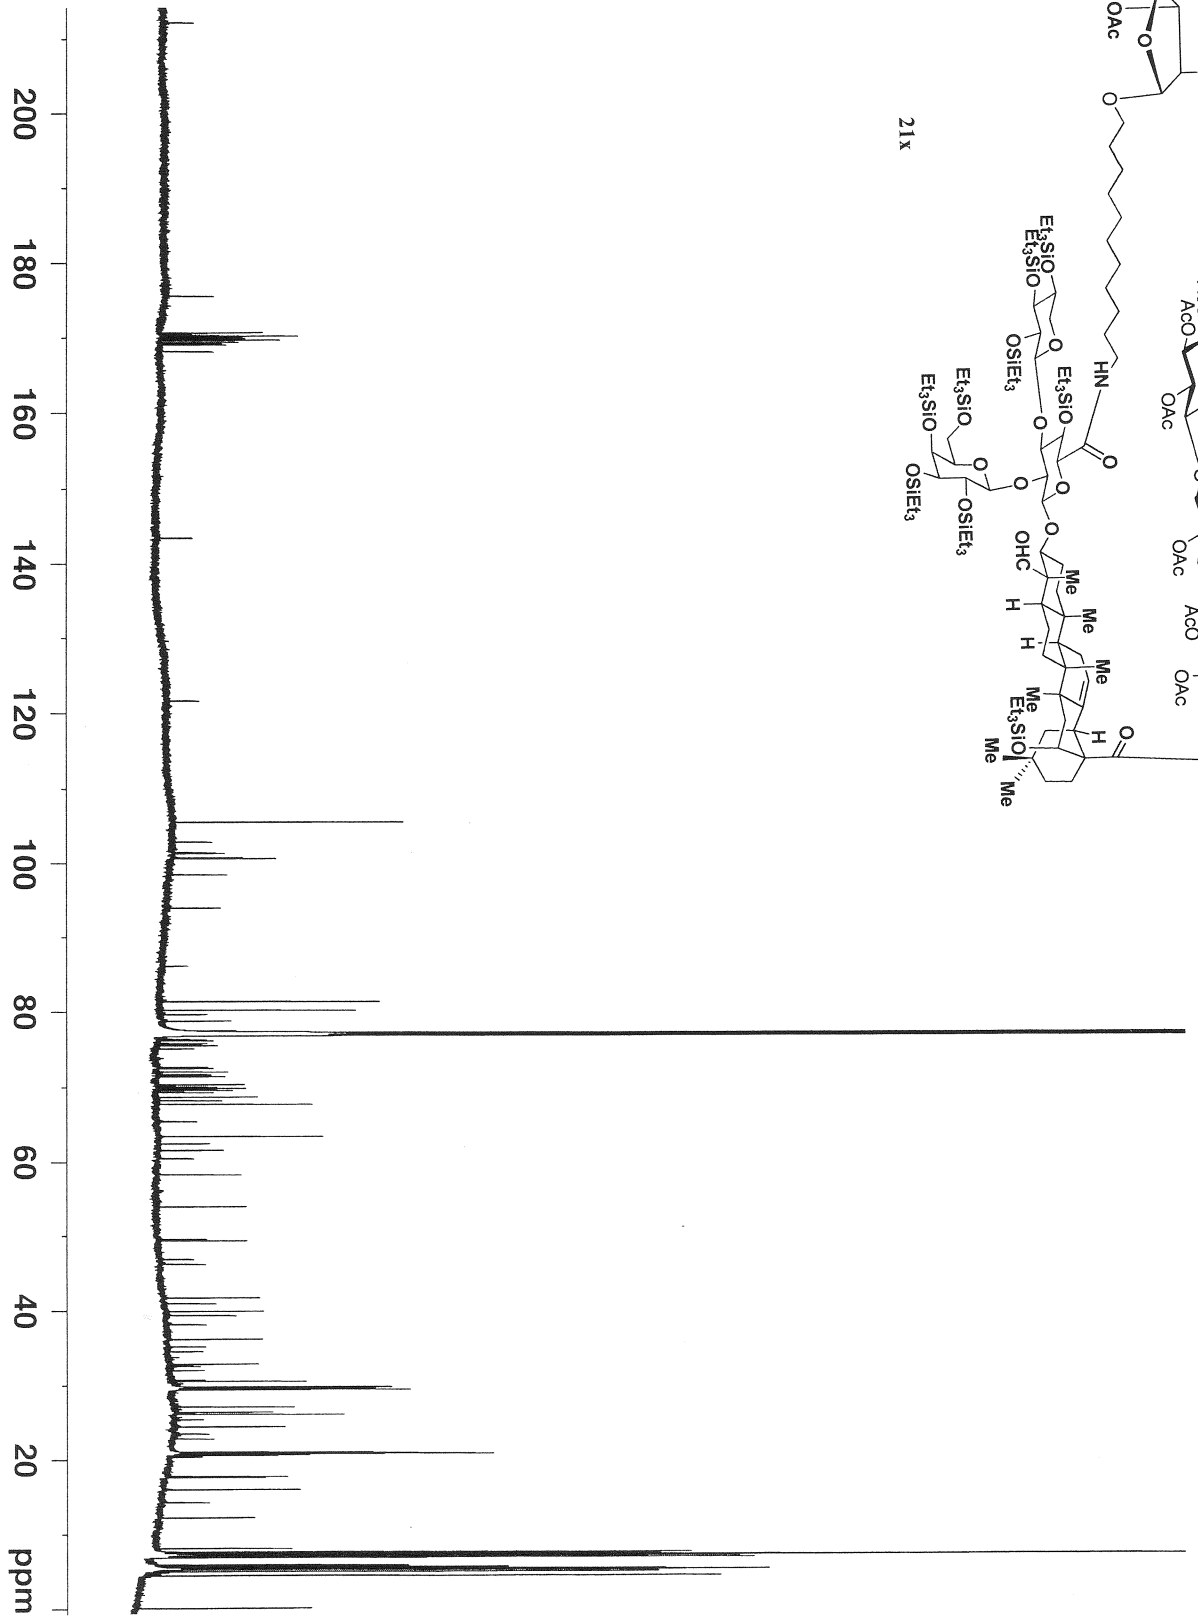

```

NAME          VII-12
EXPNO         702
PROCNO       1
Date_        20130618
Time         16.12
INSTRUM      spect
PROBHD       5 mm CPTCI 1H-
PULPROG      zgpg30
TD           65536
SOLVENT      CDCl3
NS           4096
DS           4
SWH          41666.668
FIDRES       0.635783
AQ           0.7864820
RG           64
DW           12.000
DE           20.000
TE           296.6
D1           4.19999981
D11          0.030000000
TD0          1

===== CHANNEL f1 =====
NUC1         13C
P1           61.00
PL1         91.30
PL1W        128.76077271
SFO1        176.0395312

===== CHANNEL f2 =====
CPDPRG2     waltz16
NUC2         1H
PCPD2       65.00
PL2         1.30
PL12        19.50
PL13        19.50
PL2W        6.88972235
PL12W       0.10428017
PL13W       0.10428017
SFO2        700.0228001
SI          131072
SF          176.0201727
WDW         EM
SSB         0
LB          1.00
GB          0
PC          1.40
  
```

PW-VI-50-C2

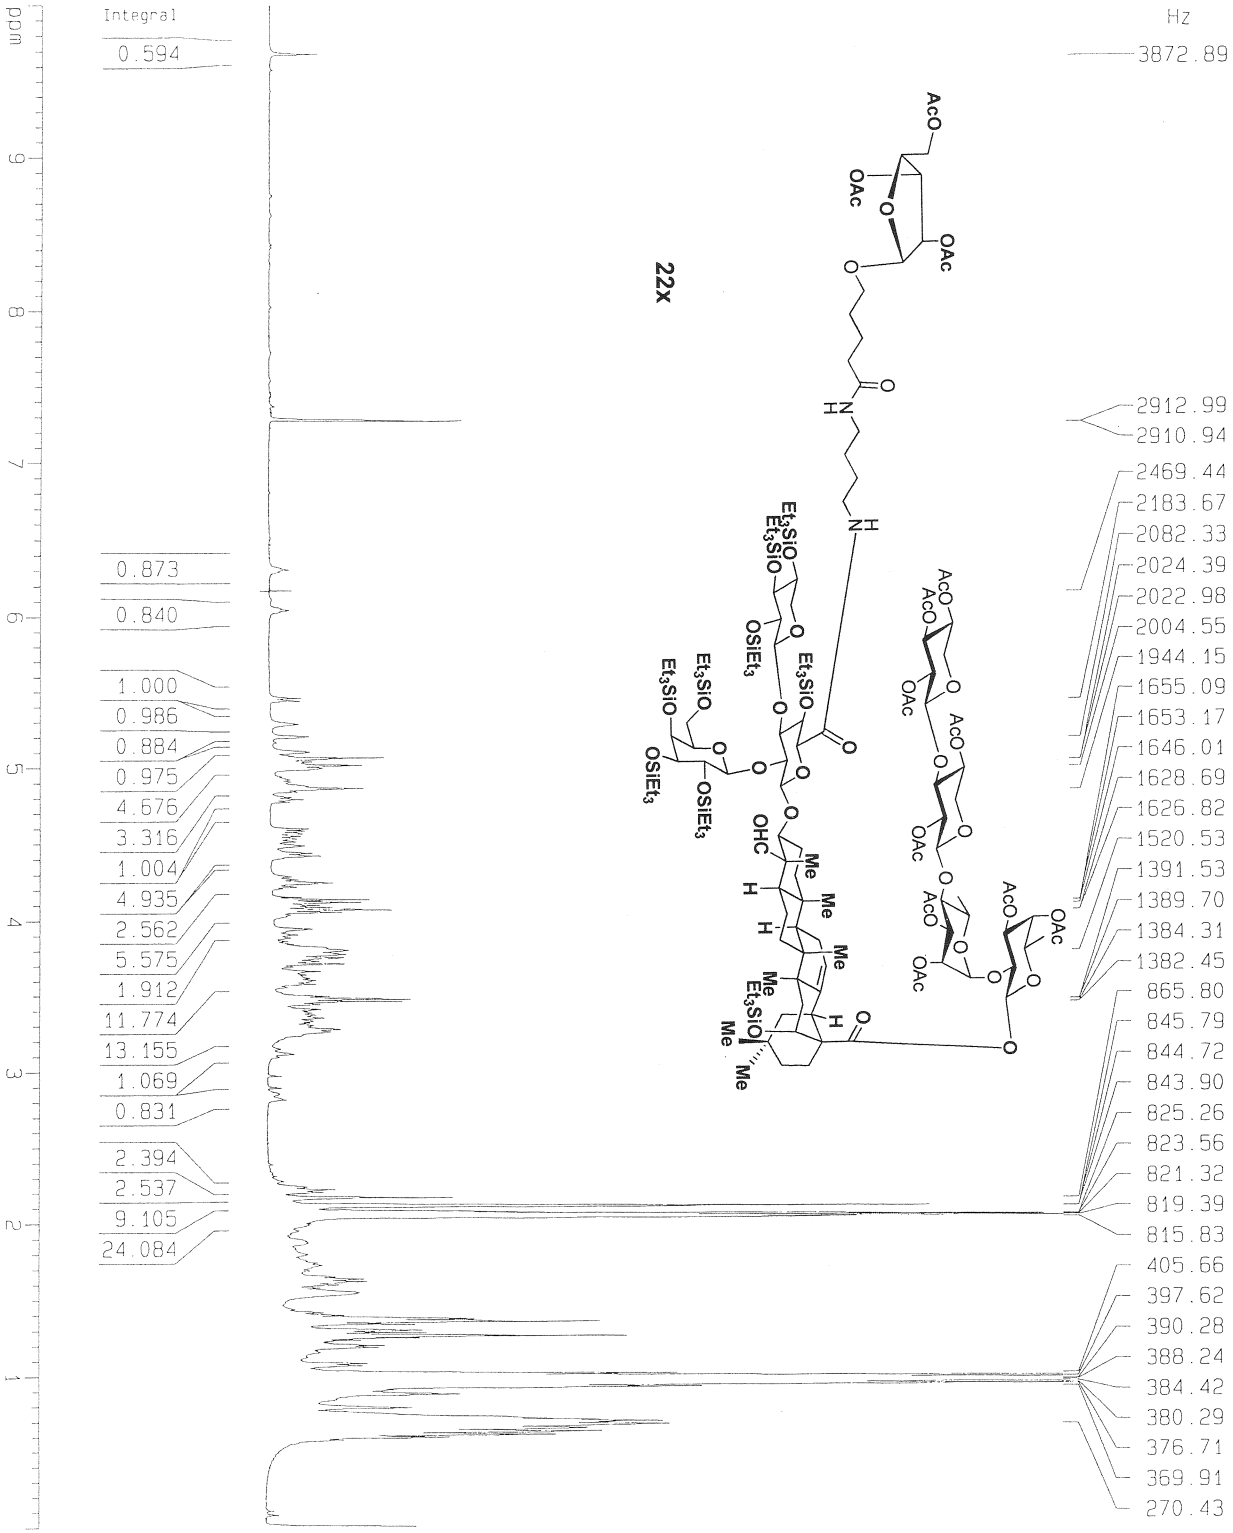

Current Data Parameters  
 NAME PW-VI-50-C2  
 EXPNO 1  
 PROCNO 1

F2 - Acquisition Parameters

Date\_ 20130202  
 Time 13.35  
 INSTRUM drx400  
 PRCBHND 5 mm Multinu  
 PULPROG zg30  
 TD 65536  
 SOLVENT CDCl3  
 NS 16  
 DS 2  
 SWH 8278.145 Hz  
 FIDRES 0.125314 Hz  
 AQ 3.9584243 sec  
 RG 64  
 DW 60.400 usec  
 DE 5.00 usec  
 TE 300.0 K  
 D1 1.00000000 sec

===== CHANNEL f1 =====

NUC1 1H  
 P1 6.50 usec  
 PL1 0.00 dB  
 SFO1 400.1324710 MHz

F2 - Processing parameters

SI 131072  
 SF 400.1300015 MHz  
 WDW no  
 SSB 0  
 LB 0.00 Hz  
 GB 0  
 PC 1.00

1D NMR plot parameters

CX 20.00 cm  
 F1P 10.000 ppm  
 F1 4001.30 Hz  
 F2P 0.000 ppm  
 F2 0.00 Hz  
 PPGCM 0.50000 ppm/cm  
 HZCM 200.05500 Hz/cm

|        |
|--------|
| 170.16 |
| 170.02 |
| 169.85 |
| 169.34 |
| 105.69 |
| 100.69 |
| 100.61 |
| 81.53  |
| 80.14  |
| 77.18  |
| 77.00  |
| 76.82  |
| 69.91  |
| 68.74  |
| 67.35  |
| 63.33  |
| 54.02  |
| 41.68  |
| 39.93  |
| 39.11  |
| 36.21  |
| 30.48  |
| 28.77  |
| 26.35  |
| 24.41  |
| 22.53  |
| 20.91  |
| 20.86  |
| 20.78  |
| 20.76  |
| 20.73  |
| 20.66  |
| 20.58  |
| 20.54  |
| 20.49  |
| 17.66  |
| 17.55  |
| 15.91  |
| 15.90  |
| 7.52   |
| 7.42   |
| 7.22   |
| 7.13   |
| 7.12   |
| 7.09   |
| 7.00   |
| 6.82   |
| 6.78   |
| 5.84   |
| 5.69   |
| 5.46   |
| 5.38   |
| 5.31   |
| 5.27   |
| 5.24   |
| 4.99   |
| 4.47   |
| -0.02  |

Current Data Parameters  
NAME DD-3-123-C13  
EXENO 1  
PROCNO 1

F2 - Acquisition Parameters  
Date\_ 20151209  
Time 16.20  
INSTRUM spect  
PROBHD 5 mm CPTCI 1H-  
PULPROG zgpg30  
TD 65536  
SOLVENT CDCl3  
DS 20657  
NS 4  
SWH 41666.668 Hz  
FIDRES 0.635793 Hz  
AQ 0.7864320 sec  
RG 256  
DWM 12.000 usec  
DE 20.00 usec  
TE 300.0 K  
T1 2.00000000 sec  
D11 0.103000000 sec  
TD0 1

==== CHANNEL f1 =====  
SF01 176.0377702 MHz  
NUC1 13C  
P1 14.00 usec  
PLW1 95.000000000 W

==== CHANNEL f2 =====  
SF02 700.0228001 MHz  
NUC2 1H  
P2 1.40 usec  
PLW2 6.900000010 W  
PLW12 0.10452000 W  
PLW13 0.04416000 W

F2 - Processing parameters  
SI 32768  
SF 176.0201686 MHz  
WDW no  
SSB 0  
LB 0 Hz  
GB 0  
PC 1.40

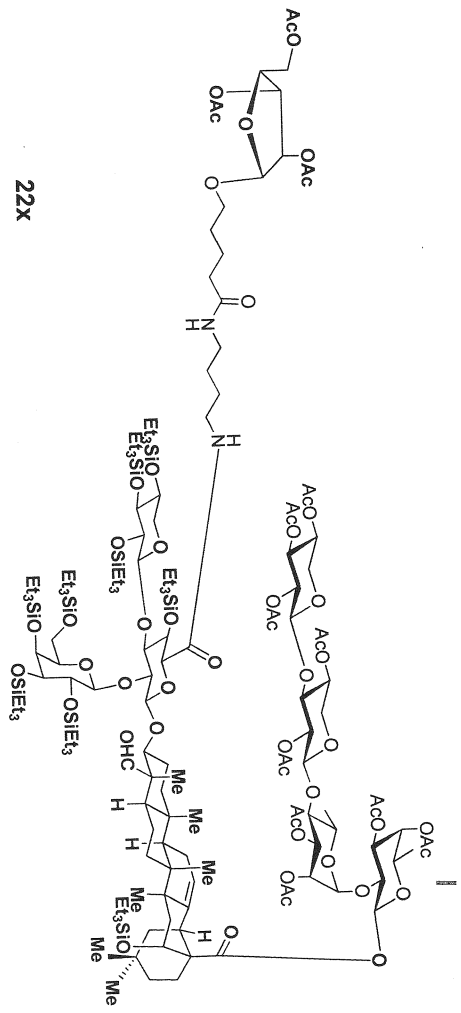

22X

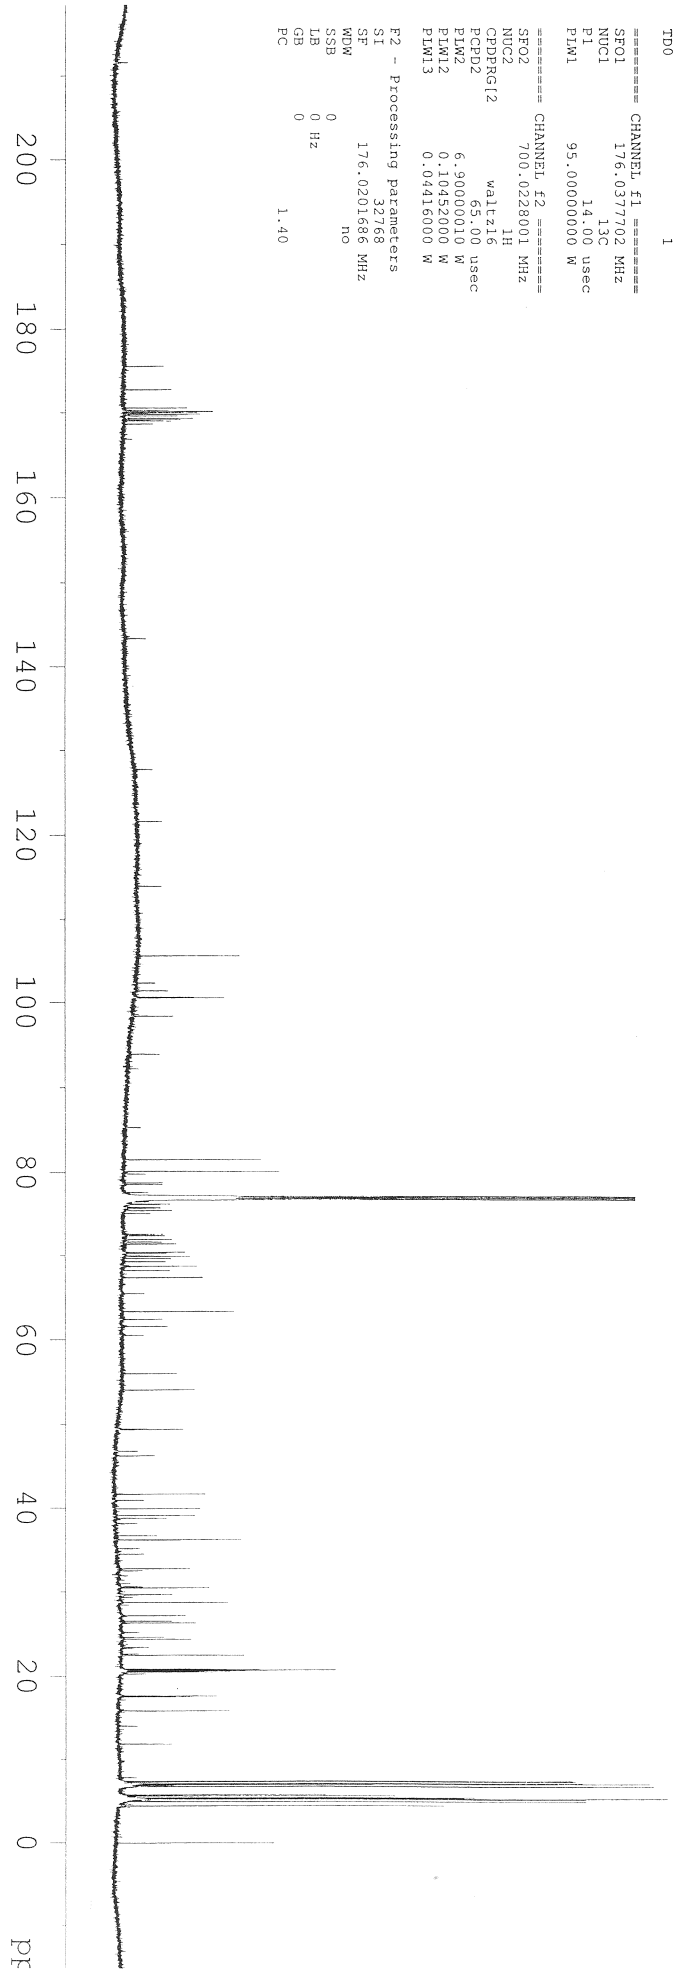

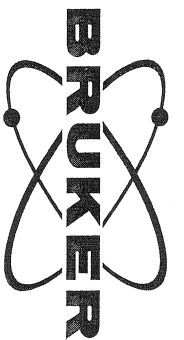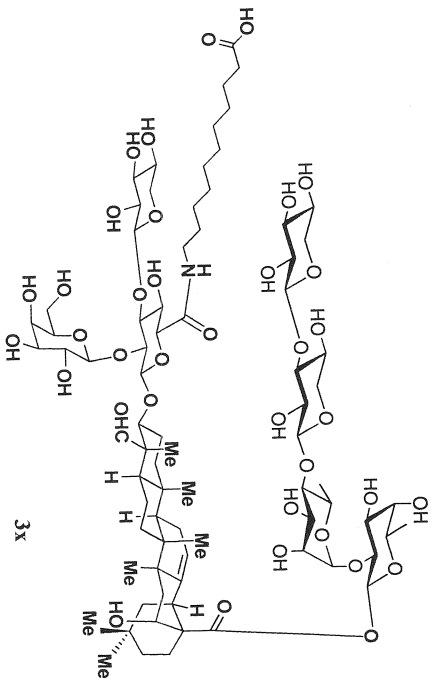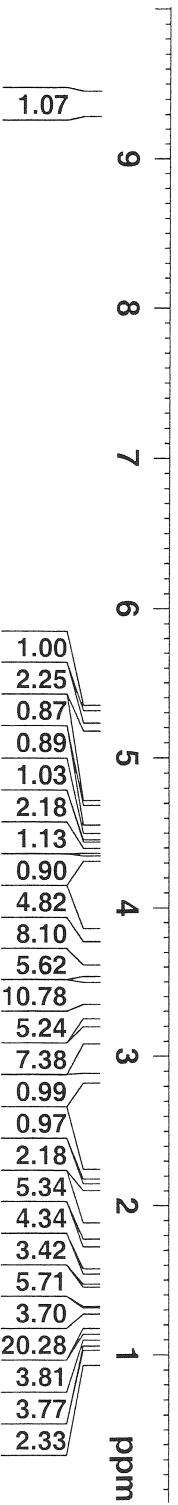

```

NAME PW-VIII-14-2
EXPNO 701
PROCNO 1
Date_ 20131028
Time 11.48
INSTRUM spect
PROBHD 5 mm CPTCI 1H-
PULPROG zg30
TD 65536
SOLVENT MeOD
NS 64
DS 0
SWH 8417.509 Hz
FIDRES 0.128441 Hz
AQ 3.8928883 sec
RG 16
DW 59.400 use
DE 6.50 use
TE 298.0 K
D1 1.00000000 sec
TD0

===== CHANNEL f1 =====
NUC1 1H
P1 8.00 use
PL1 1.30 dB
PL1W 6.88972235 W
SF01 700.0240601 MHz
SI 65536
SF 700.0200852 MHz
WDW no
SSB 0
LB 0.00 Hz
GB 0
PC 1.00
  
```

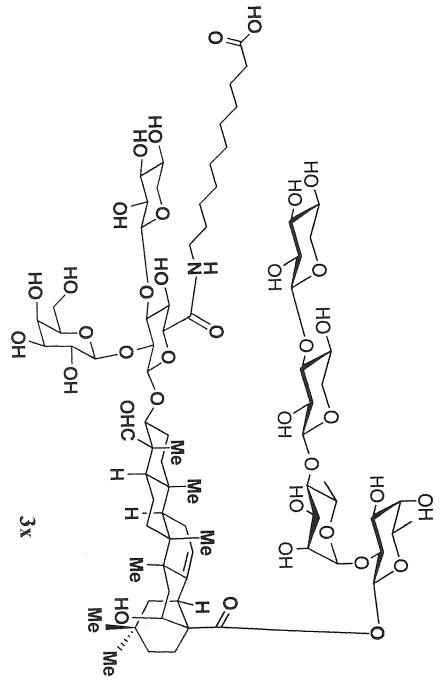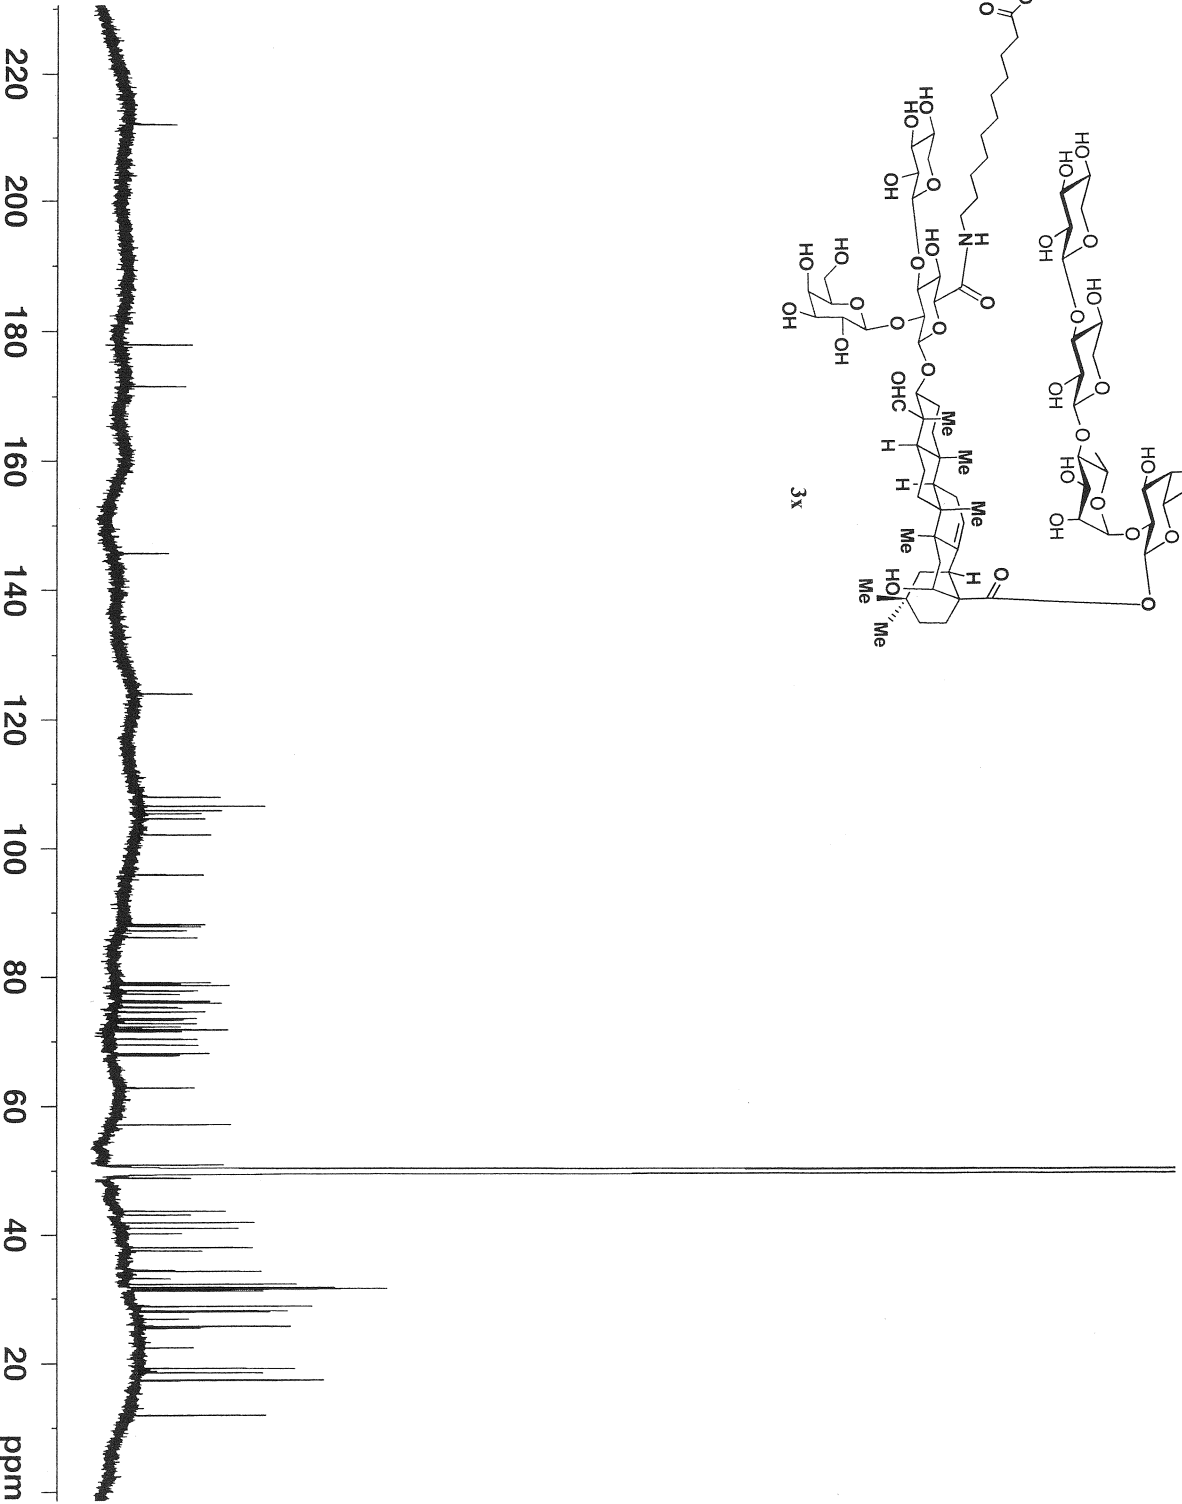

```

NAME          PW-VIII-14-2
EXPNO         702
PROCNO        1
Date_         20131029
Time         0.04
INSTRUM       spect
PROBHD        5 mm CP1H-
PULPROG       zgpg30
TD            65536
SOLVENT       MeOD
NS            8192
DS            8
SWH           41666.668 Hz
FIDRES       0.635783 Hz
AQ           0.7864820 sec
RG           256
DW           12.000 usec
DE           6.50 usec
TE           298.0 K
D1           2.20000005 sec
D11          0.03000000 sec
TD0          1

===== CHANNEL F1 =====
NUC1          13C
P1           14.00 usec
PL1          0.00 dB
PL1W         95.45168304 W
SFO1         176.0395312 MHz

===== CHANNEL F2 =====
CPDPRG2      waltz16
NUC2         1H
PCPD2        65.00 usec
PL2          1.30 dB
PL12         19.50 dB
PL13         19.50 dB
PL2W         6.88972235 W
PL12W        0.10428017 W
PL13W        0.10428017 W
SFO2         700.0228001 MHz
SI           32768
SF           176.0197706 MHz
WDW          EM
SSB          0
LB           1.00 Hz
GB           0
PC           1.40
  
```

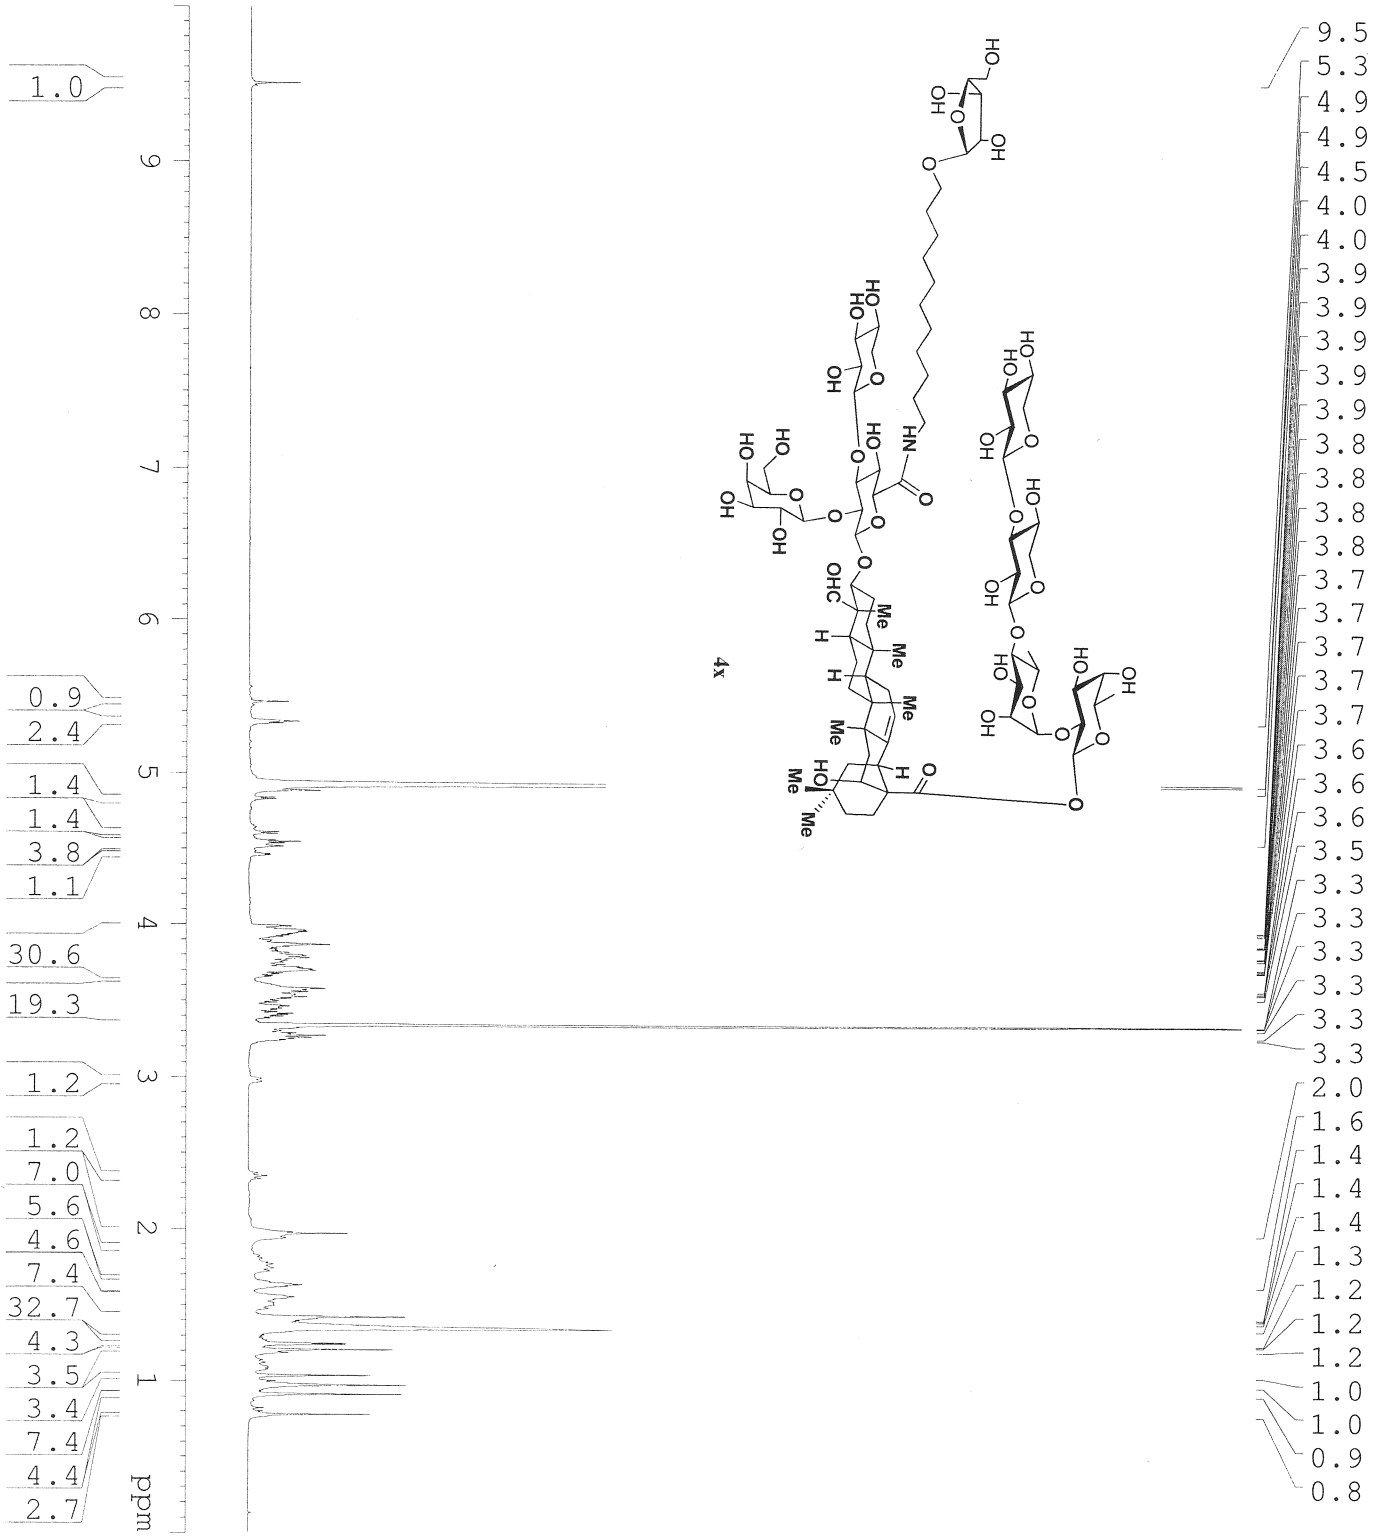

Current Data Parameters  
 NAME PW-IX-2H  
 EXPNO 1  
 PROCNO 1

F2 - Acquisition Parameters  
 Date\_ 20160304  
 Time 14.09

INSTRUM spect  
 PROBHD 5 mm CPTCI 1H-  
 PULPROG zg30  
 TD 65536  
 SOLVENT MeOD  
 NS 16  
 DS 2

SWH 14097.744 Hz  
 FIDRES 0.215115 Hz  
 AQ 2.3243434 sec  
 RG 25.4  
 DW 35.467 usec  
 DE 10.00 usec  
 TE 298.0 K  
 D1 1.00000000 sec  
 TD0 1

==== CHANNEL F1 =====  
 SFO1 700.0243229 MHz  
 NUCL 1H  
 P1 8.00 usec  
 PLWI 6.90000010 W

F2 - Processing parameters  
 SI 65536  
 SF 700.0199922 MHz  
 WDW no  
 SSB 0 Hz  
 LB 0  
 GB 0  
 PC 1.00

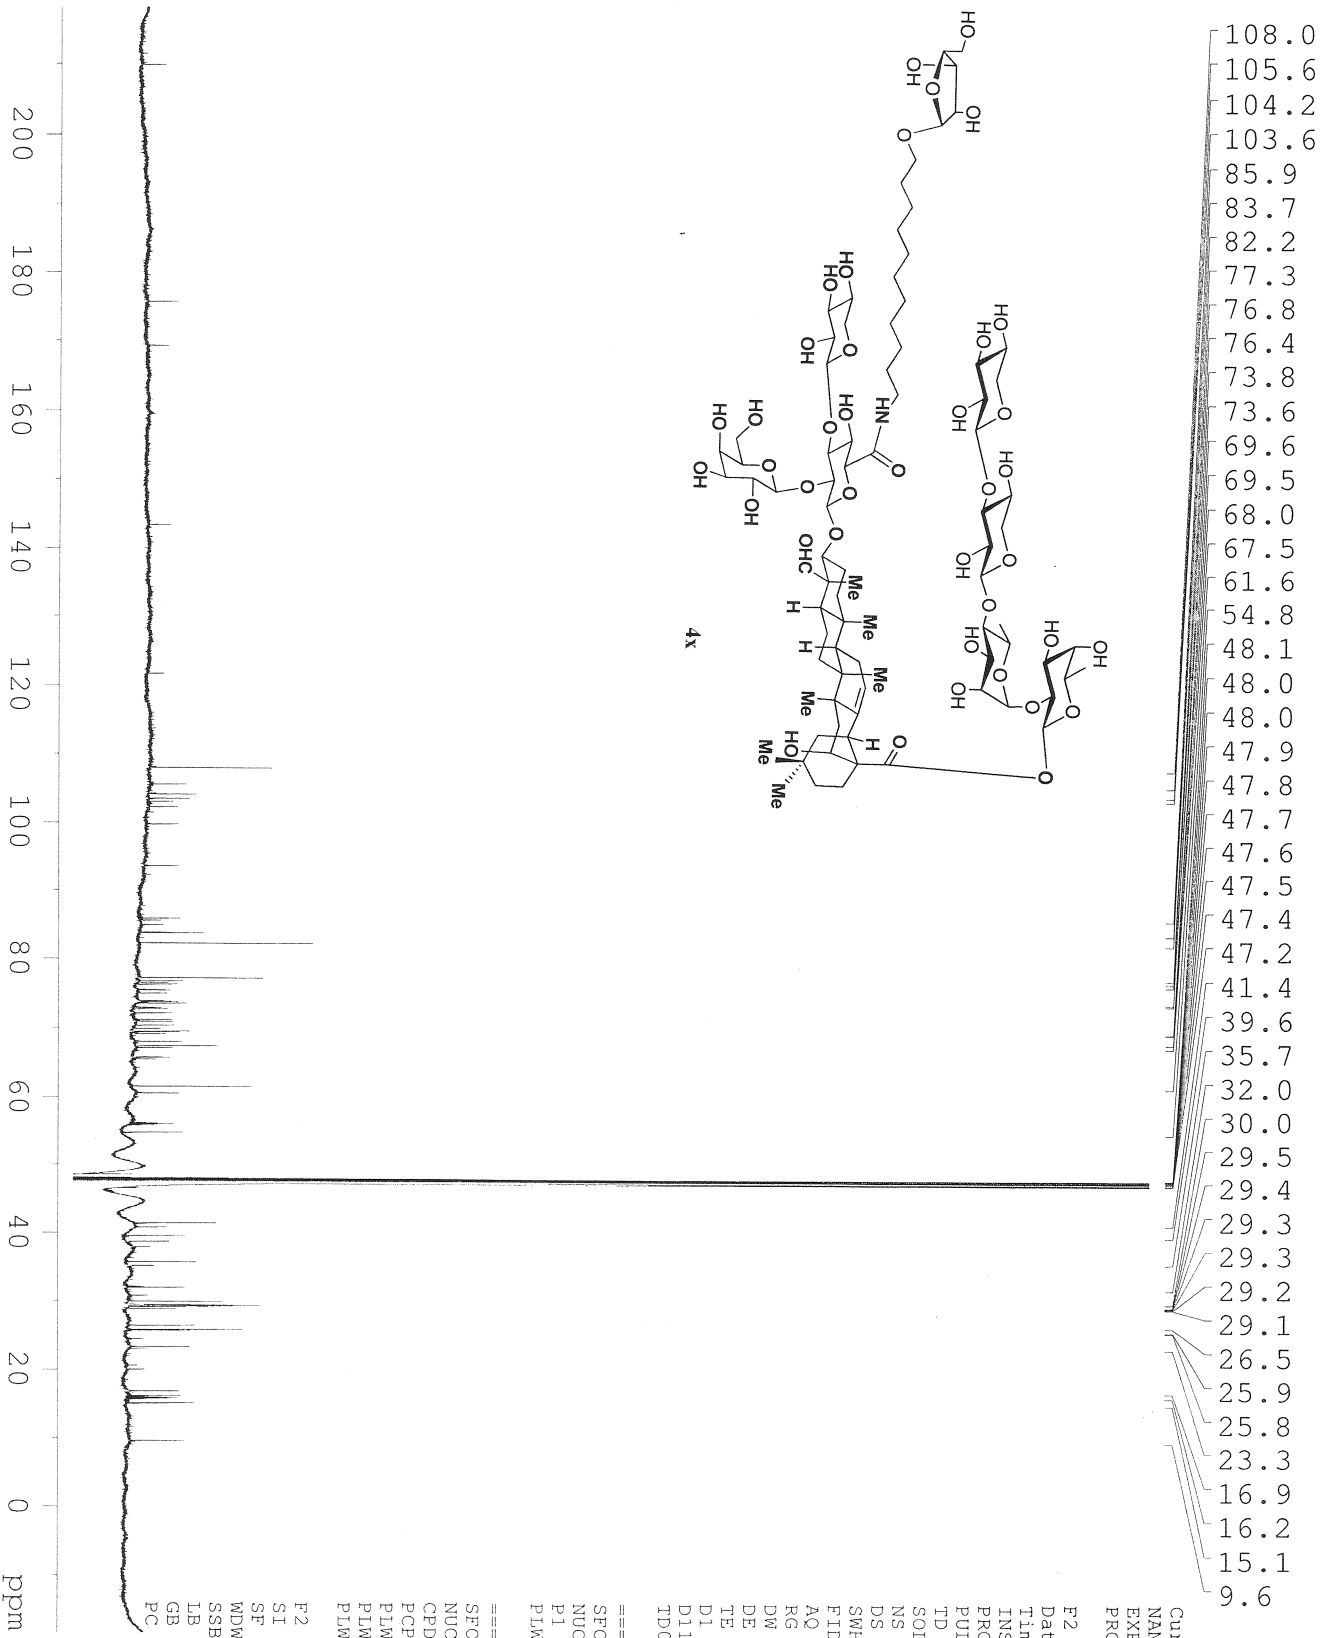

- 108.0
- 105.6
- 104.2
- 103.6
- 85.9
- 83.7
- 82.2
- 77.3
- 76.8
- 76.4
- 73.8
- 73.6
- 69.6
- 69.5
- 68.0
- 67.5
- 61.6
- 54.8
- 48.1
- 48.0
- 48.0
- 47.9
- 47.8
- 47.7
- 47.6
- 47.5
- 47.4
- 47.2
- 41.4
- 39.6
- 35.7
- 32.0
- 30.0
- 29.5
- 29.4
- 29.3
- 29.3
- 29.2
- 29.1
- 26.5
- 25.9
- 25.8
- 23.3
- 16.9
- 16.2
- 15.1
- 9.6

Current Data Parameters  
 NAME PW-IX-2C13  
 EXPNO 1  
 PROCNO 1

F2 - Acquisition Parameters  
 Date\_ 20160304  
 Time 14.33

INSTRUM spect  
 PROBHD 5 mm CPTCI 1H-  
 PULPROG zgpg30  
 TD 65536  
 SOLVENT MeOD  
 NS 23739  
 DS 4

SWH 41666.668 Hz  
 FIDRES 0.635783 Hz  
 AQ 0.7864320 sec  
 RG 256

DW 12.000 usec  
 DE 18.00 usec  
 TE 298.05 K  
 D1 2.00000000 sec  
 D11 0.03000000 sec  
 ID0 1

CHANNEL F1  
 SFO1 176.0377702 MHz  
 NUC1 13C  
 P1 14.00 usec  
 PLW1 95.00000000 W

CHANNEL F2  
 SFO2 700.0228001 MHz  
 NUC2 1H  
 CPDPRG12 waltz16  
 PCPD2 65.00 usec  
 PLW2 6.90000010 W  
 PLW12 0.10452000 W  
 PLW13 0.04416000 W

F2 - Processing parameters  
 SI 32768  
 SF 176.0201690 MHz  
 WDW no  
 SSB 0 Hz  
 LB 0  
 GB 0  
 PC 1.40

PW-IX-1H

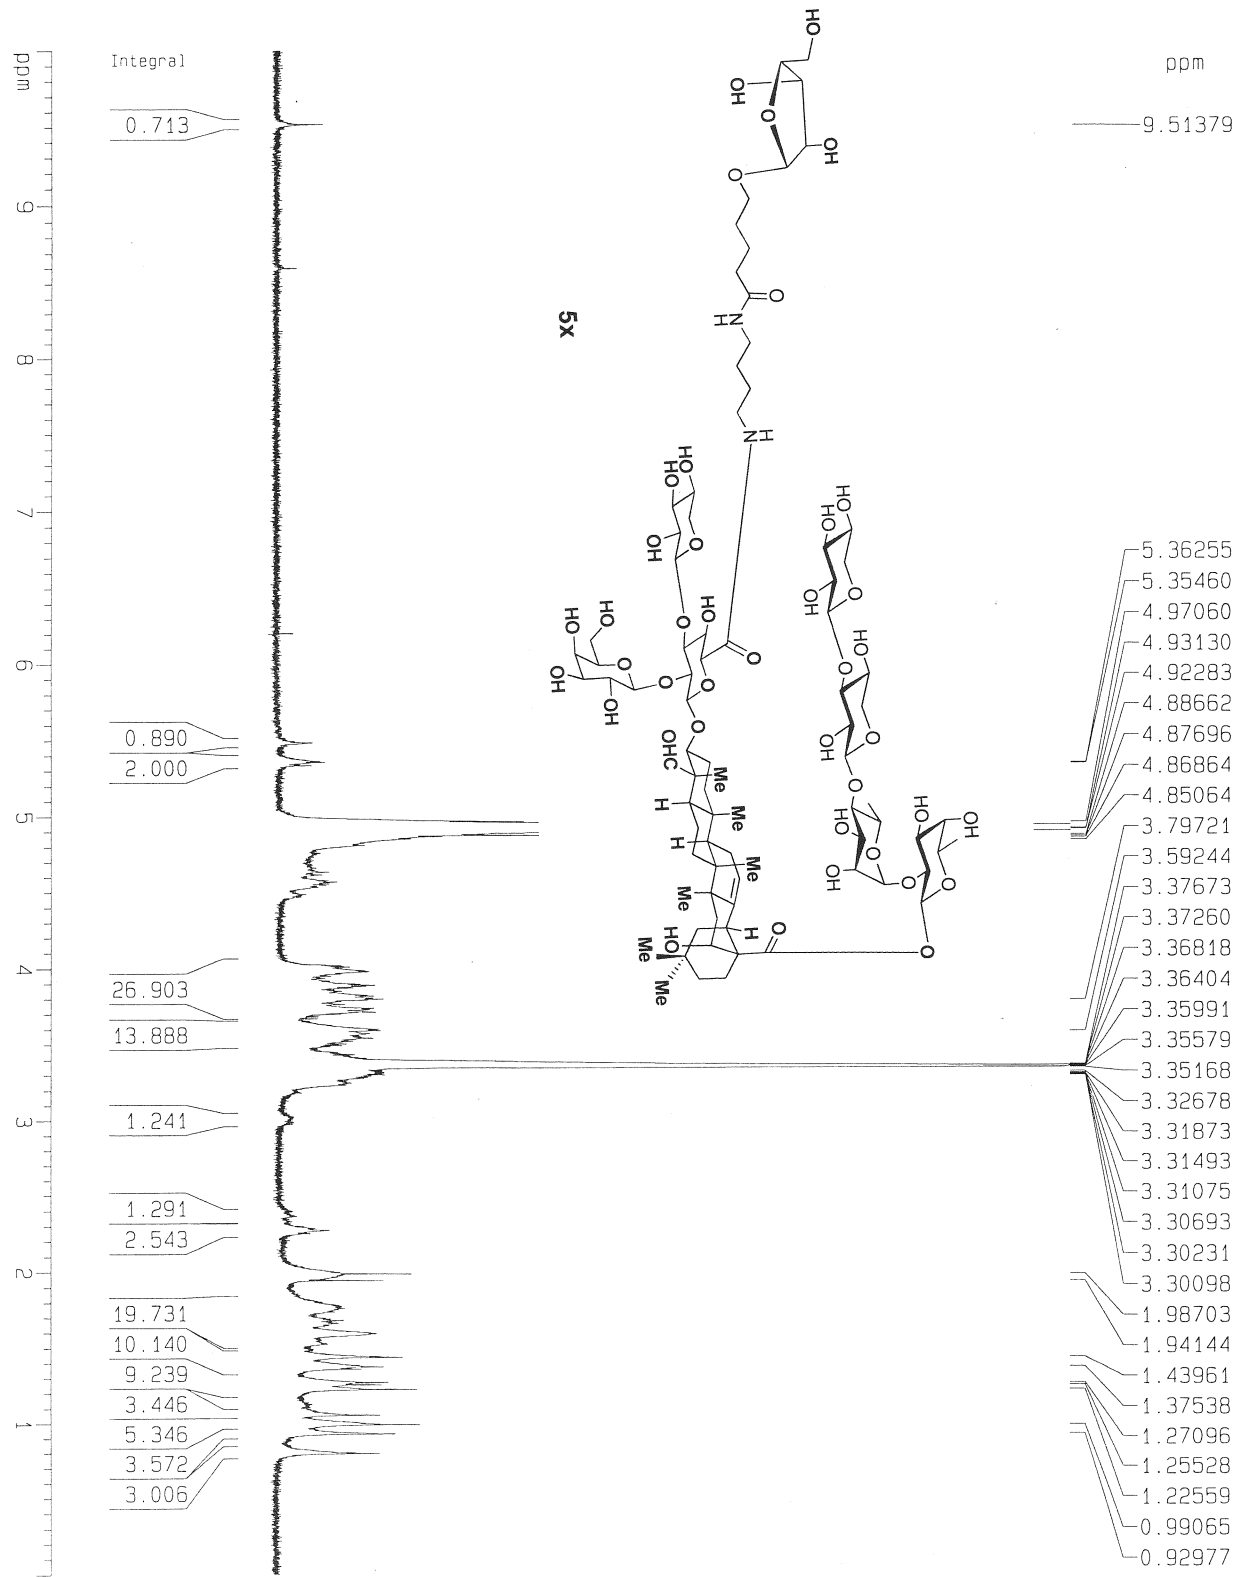

Current Data Parameters  
 NAME PW-IX-1H  
 EXPNO 1  
 PROCNO 1

F2 - Acquisition Parameters  
 Date\_ 20160223  
 Time 10.54  
 INSTRUM drx400  
 PROBHD 5 mm Multinu  
 PULPROG zg30  
 TD 65536  
 SOLVENT MeOH  
 NS 16  
 DS 2  
 SWH 8278.146 Hz  
 FIDRES 0.126314 Hz  
 AQ 3.9584243 sec  
 RG 512  
 DW 60.400 usec  
 DE 6.00 usec  
 TE 300.0 K  
 D1 1.00000000 sec

==== CHANNEL f1 =====  
 NUC1 1H  
 P1 6.50 usec  
 PL1 0.00 dB  
 SF01 400.1324710 MHz

F2 - Processing Parameters  
 S1 131072  
 SF 400.1299870 MHz  
 WDW no  
 SSB 0  
 LB 0.00 Hz  
 GB 0  
 PC 1.00

1D NMR plot parameters  
 CX 20.00 cm  
 F1P 10.000 dpm  
 F1 4001.39 Hz  
 F2P 0.000 dpm  
 F2 0.00 Hz  
 PPMCM 0.50000 dpm/cm  
 HZCM 200.06499 Hz/cm



|         |
|---------|
| 174.681 |
| 169.429 |
| 108.060 |
| 105.603 |
| 104.168 |
| 103.560 |
| 103.140 |
| 83.905  |
| 82.205  |
| 77.323  |
| 76.343  |
| 75.598  |
| 75.509  |
| 75.012  |
| 74.018  |
| 73.929  |
| 73.823  |
| 73.627  |
| 71.231  |
| 70.983  |
| 70.432  |
| 69.953  |
| 69.545  |
| 68.036  |
| 67.149  |
| 66.950  |
| 65.853  |
| 65.782  |
| 65.498  |
| 61.676  |
| 56.073  |
| 48.123  |
| 47.962  |
| 47.840  |
| 47.718  |
| 47.595  |
| 47.473  |
| 47.352  |
| 47.232  |
| 38.447  |
| 35.358  |
| 35.181  |
| 28.613  |
| 26.221  |
| 25.720  |
| 15.123  |
| 9.621   |

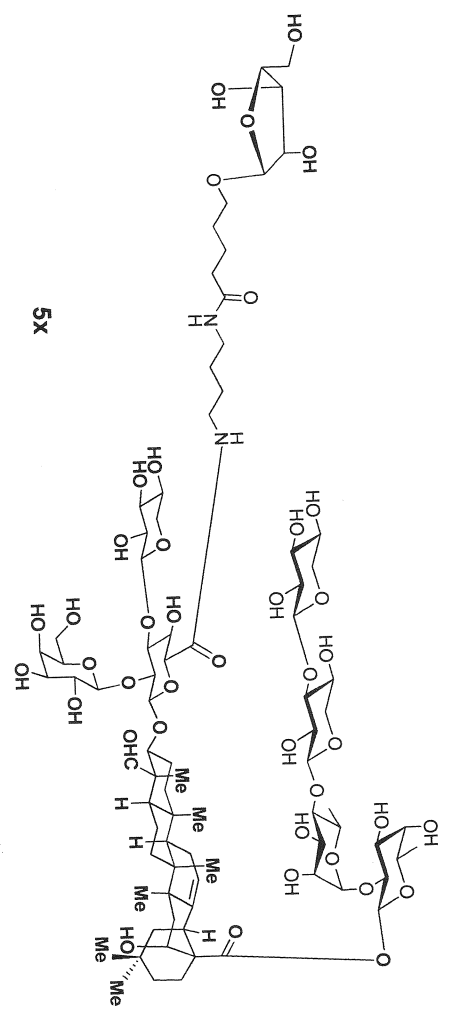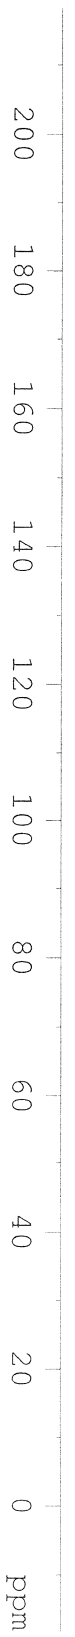

Current Data Parameters  
 NAME PW-IX-1C13  
 EXPNO 1  
 PROCNO 1

F2 - Acquisition Parameters  
 Date\_ 20160223  
 Time 12.43  
 INSTRUM spect  
 PROBHD 5 mm CPTCI 1H-  
 PULPROG zgpg30  
 TD 65536  
 SOLVENT MeOD  
 NS 25634  
 DS 4  
 SWH 41666.668  
 FIDRES 0.635783  
 AQ 0.7864320  
 RG 129.256  
 DW 18.00  
 DE 18.00  
 TE 293.0  
 D1 2.00000000  
 D11 0.03000000  
 TD0 1

==== CHANNEL f1 ====  
 SF01 176.0377702  
 NUC1 13C  
 P1 14.00  
 PLW1 95.00000000

==== CHANNEL f2 ====  
 SF02 700.0228001  
 NUC2 1H  
 CPDPRG12 waltz16  
 PCPD2 65.00  
 PLW2 6.90000010  
 PLW12 0.10452000  
 PLW13 0.04416000

F2 - Processing Parameters  
 SI 32768  
 SF 176.0201690  
 WDW EM  
 SSB 0  
 LB 1.00  
 GB 0  
 PC 1.00
